# Supplementary material
Source: PubMed Central journal article supplement (PMC5641944)
Supplement: jp7b08714_si_001.pdf [file jp7b08714_si_001.pdf]

## Supporting information

### The Electronic Structure of the $[\text{Cu}_3(\mu\text{-O})_3]^{2+}$ Cluster in Mordenite Zeolite and its Effects on the Methane to Methanol Oxidation

Konstantinos D. Vogiatzis<sup>1,\*</sup>, Guanna Li<sup>2,3</sup>, Emiel J.M. Hensen,<sup>2,4</sup> Laura Gagliardi<sup>5</sup>, Evgeny A. Pidko<sup>2,4,6\*</sup>

<sup>1</sup> *Department of Chemistry, University of Tennessee, Knoxville, TN 37996, United States*

<sup>2</sup> *Inorganic Materials Chemistry Group, Eindhoven University of Technology, PO Box 513, Eindhoven 5600 MB, The Netherlands*

<sup>3</sup> *Catalysis Engineering, Department of Chemical Engineering, Delft University of Technology, Van Oort  
Massage 9, 2629 HZ Delft, the Netherlands*

<sup>4</sup> *Institute for Complex Molecular Systems, Eindhoven University of Technology, Eindhoven 5600 MB,  
The Netherlands*

<sup>5</sup> *Department of Chemistry, and Supercomputing Institute, University of Minnesota, Minneapolis,  
Minnesota 55455, United States*

<sup>6</sup> *Theoretical Chemistry group, ITMO University, Kronverkskiy pr., 49, St. Petersburg 197101, Russia*

\*E-mail: [kvogiatz@utk.edu](mailto:kvogiatz@utk.edu) (K. D. V.).

\*E-mail: [e.a.pidko@tue.nl](mailto:e.a.pidko@tue.nl) (E. A. P.)

#### TABLE OF CONTENTS

| Section                                                                                                       | Page |
|---------------------------------------------------------------------------------------------------------------|------|
| S1. Examination of different active spaces                                                                    | S2   |
| S2. Key orbitals of the ground doublet state obtained from the CASSCF(11,11)                                  | S6   |
| S3. Key orbitals of the 5 doublet states obtained from the SA(5)-RASSCF(19,21) level                          | S7   |
| S4. Geometrical details of the $[\text{Cu}_3(\mu\text{-O})_3]^{2+}$ complex optimized with the PBE functional | S9   |
| S5. Effect of the choice of the functional.                                                                   | S11  |
| S6. Single point DFT energies for benchmarking the choice of the functional                                   | S13  |
| S7. Cartesian coordinates of the $[\text{Cu}_3(\mu\text{-O})_3]^{2+}$ cluster                                 | S15  |
| S8. Structures Optimized with Periodic DFT                                                                    | S17  |

## S1. Examination of different active spaces

For the consideration of the proper active space, a formal charge of 2+ for each Cu was initially assumed, with a formal  $3d^9$  electronic configuration per Cu. Based on this assumption, and in order to have a total charge of 2+ for the  $[\text{Cu}_3(\mu\text{-O})_3]^{2+}$  core, one  $\text{O}^{2-}$  and two  $\text{O}^{\cdot-}$  atoms are expected. After the examination of active spaces of various sizes, we concluded that the energetically most stable states are described by a minimal active space of size (5,5), i.e. 5 electrons in 5 orbitals. The CAS(5,5) includes bonding ( $\sigma$ )/antibonding ( $\sigma^*$ ) combinations of the  $3d_{x^2-y^2}$  orbitals of two Cu atoms with the  $2p$  of two neighboring O atoms, respectively, and a singly occupied  $3d_{x^2-y^2}$  atomic orbital of the third Cu atom.

Results from the CASPT2(5,5) level of theory are of little use. Even if CASPT2(5,5) predicts correctly the doublet state ( $S = 1/2$ ) as the ground state, it underestimates the energy of the quartet ( $S = 3/2$ ) and sextet ( $S = 5/2$ ) states. For example, the energy differences between the doublet ground state and the quartet and sextet states are 55.6 and 136.8 kJ/mol, respectively. DFT results have shown that these energy differences are considerably lower. For example, the doublet-quartet energy gap varies between 15.7 and 31.2 kJ/mol by considering different GGA and hybrid density functionals.

The (5,5) orbital space was confirmed as the minimal space that describes this system by examination of larger active spaces such as, for example, of size (11,11) (13,13), and (15,15). These active spaces augment the (5,5) minimal space with  $2p/3p$  orbitals of the three O atoms of the  $[\text{Cu}_3(\mu\text{-O})_3]^{2+}$  core. The occupation numbers of the  $2p$  orbitals vary between 1.93-1.98. Results from these active spaces are shown in supporting information (Table S1). It was found that the doubly occupied  $3d$  atomic orbitals of the three Cu atoms do not participate in the bonding between the Cu and the ( $\mu\text{-O}$ ) atoms. Therefore, they are not further considered in this study.

All  $2p$  orbitals of the three O atoms with the corresponding  $3p$ -shell are needed for a balanced description of the electronic configuration of the  $[\text{Cu}_3(\mu\text{-O})_3]^{2+}$  core. The orbital space that includes all  $2p/3p$  orbitals of the three O atoms and the  $3d_{x^2-y^2}$  orbitals of the three Cu atoms has a size of (19,21). The current CASSCF implementations are not able to treat such large spaces. Instead of CASSCF, calculations with the RAS scheme were performed. Three individual orbital spaces are considered in the RASSCF method: RAS1, RAS2, and RAS3. The correlated orbital space of RASSCF(19,21) was organized as such: RAS2 includes the (5,5)

minimal space described above. A full CI expansion is considered within the RAS2(5,5) space, i.e. all possible configuration state functions (or Slater determinants) were constructed from the five electrons in the five orbitals of RAS2, as in the case of CAS(5,5). RAS1 includes the seven  $2p$  orbitals of the three O atoms which do not participate in the bonding/antibonding combinations with the  $3d_{x^2-y^2}$  orbitals of Cu atoms. All configurations that involve up to two electron excitations from RAS1 to RAS2 and RAS3 are considered in the CI expansion. RAS3 includes the nine unoccupied  $3p$  orbitals of the three O atoms. Similarly, all configurations that involve up to two electron excitations to RAS3 from RAS1 and RAS2 are considered in the CI expansion.

The doublet state was found the most energetically favorable state for all active spaces attempted in this study. A disagreement on the electronic structure of the  $[\text{Cu}_3(\mu\text{-O})_3]^{2+}$  core between the CASSCF(11,11) and RASSCF(19,21) results indicated that the doublet CASSCF(11,11) has not converged to the most stable state. For that reason, a CASSCF(11,11) calculation was performed by using the RASSCF optimized orbitals as a starting guess. This calculation converged to a new state 59.2 kJ/mol more stable than the initial CASSCF(11,11) state (Table S1).

Table S1: CASSCF/RASSCF and CASPT2/RASPT2 energies calculated with different choices of active spaces and for different spin states.

| Active Space | Spin State | Dominant Configuration <sup>1</sup> | Weight | CASSCF/<br>RASSCF<br>Energy | CASPT2/<br>RASPT2<br>Energy |
|--------------|------------|-------------------------------------|--------|-----------------------------|-----------------------------|
| CAS(5,5)     | Doublet    | <b>2200u</b>                        | 0.51   | -9213.52694223              | -9218.65212795              |
|              |            | <b>0202u</b>                        | 0.12   |                             |                             |
|              |            | <b>2020u</b>                        | 0.11   |                             |                             |
|              |            | <b>0022u</b>                        | 0.08   |                             |                             |
| CAS(5,5)     | Quartet    | <b>u20uu</b>                        | 0.73   | -9213.51890924              | -9218.63096689              |
|              |            | <b>u02uu</b>                        | 0.27   |                             |                             |
| CAS(5,5)     | Sextet     | <b>uuuuu</b>                        | 1.00   | -9213.50696736              | -9218.60001037              |
| CAS(7,7)     | Doublet    | 2 <b>2200u</b> 0                    | 0.52   | -9213.54536483              | -9218.65480340              |

|                         |                |                          |      |                       |                |
|-------------------------|----------------|--------------------------|------|-----------------------|----------------|
|                         |                | 2 <b>0202u</b> 0         | 0.20 |                       |                |
|                         |                | 2 <b>2020u</b> 0         | 0.16 |                       |                |
|                         |                | 2 <b>0022u</b> 0         | 0.07 |                       |                |
| CAS(7,7)                | Quartet        | 2 <b>u20uu</b> 0         | 0.75 | -9213.53749793        | -9218.63435688 |
|                         |                | 2 <b>u02uu</b> 0         | 0.24 |                       |                |
| CAS(7,7)                | Sextet         | 2 <b>uuuuu</b> 0         | 0.99 | -9213.52236678        | -9218.59942192 |
| CAS(11,11)              | Doublet        | 222 <b>2200u</b> 000     | 0.54 | -9213.61524537        | -9218.66002784 |
|                         |                | 222 <b>0202u</b> 000     | 0.22 |                       |                |
|                         |                | 222 <b>2020u</b> 000     | 0.11 |                       |                |
|                         |                | 222 <b>0022u</b> 000     | 0.04 |                       |                |
| CAS(11,11)              | Quartet        | 222 <b>u20uu</b> 000     | 0.76 | -9213.60999102        | -9218.63727898 |
|                         |                | 222 <b>u02uu</b> 000     | 0.18 |                       |                |
| CAS(11,11)              | Sextet         | 222 <b>uuuuu</b> 000     | 0.96 | -9213.57952219        | -9218.59340763 |
| CAS(11,11) <sup>2</sup> | <b>Doublet</b> | 222 <b>2200u</b> 000     | 0.46 | <b>-9213.63779207</b> | -9218.63302736 |
|                         |                | 222 <b>0202u</b> 000     | 0.25 |                       |                |
|                         |                | 222 <b>2020u</b> 000     | 0.15 |                       |                |
|                         |                | 222 <b>0022u</b> 000     | 0.08 |                       |                |
| CAS(11,11) <sup>2</sup> | Quartet        | 222 <b>u20uu</b> 000     | 0.71 | -9213.63543336        | -9218.62516031 |
|                         |                | 222 <b>u02uu</b> 000     | 0.24 |                       |                |
| CAS(11,11) <sup>2</sup> | Sextet         | 222 <b>uuuuu</b> 000     | 0.96 | -9213.62917838        | -9218.60329797 |
| CAS(13,13)              | Doublet        | 2222 <b>2200u</b> 0000   | 0.53 | -9213.65976693        | -9218.65765782 |
|                         |                | 2222 <b>0202u</b> 0000   | 0.20 |                       |                |
|                         |                | 2222 <b>2020u</b> 0000   | 0.13 |                       |                |
|                         |                | 2222 <b>0022u</b> 0000   | 0.05 |                       |                |
| CAS(13,13)              | Quartet        | 2222 <b>u20uu</b> 0000   | 0.76 | -9213.65112376        | -9218.64119261 |
|                         |                | 2222 <b>u02uu</b> 0000   | 0.17 |                       |                |
| CAS(13,13)              | Sextet         | 2222 <b>uuuuu</b> 0000   | 0.95 | -9213.62835746        | -9218.59448076 |
| CAS(15,15)              | Doublet        | 22222 <b>2200u</b> 00000 | 0.52 | -9213.69928564        | -              |
|                         |                | 22222 <b>0202u</b> 00000 | 0.23 |                       |                |
|                         |                | 22222 <b>2020u</b> 00000 | 0.10 |                       |                |

|            |         |                                |      |                |                |
|------------|---------|--------------------------------|------|----------------|----------------|
|            |         | 22222 <b>0022u</b> 00000       | 0.05 |                |                |
| RAS(19,21) | Doublet | 2222222 <b>220u0</b> 000000000 | 0.53 | -9213.76508246 | -9218.63494471 |
|            |         | 2222222 <b>202u0</b> 000000000 | 0.18 |                |                |
|            |         | 2222222 <b>020u2</b> 000000000 | 0.14 |                |                |
|            |         | 2222222 <b>002u2</b> 000000000 | 0.05 |                |                |
| RAS(19,21) | Quartet | 2222222 <b>2uuu0</b> 000000000 | 0.74 | -9213.76011027 | -9218.62652260 |
|            |         | 2222222 <b>0uuu2</b> 000000000 | 0.18 |                |                |
| RAS(19,21) | Sextet  | 2222222 <b>uuuuu</b> 000000000 | 0.93 | -9213.74334845 | -9218.59358933 |

<sup>1</sup> 2 stands for doubly occupied MO, 0 for unoccupied MO, and u for singly occupied MO with spin 1/2. The occupation characters of the 5 core MOs are shown with bold font (see text for details).

<sup>2</sup> Start from RASSCF orbitals as guess orbitals.

## S2. Key orbitals of the ground doublet state obtained from the CASSCF(11,11)

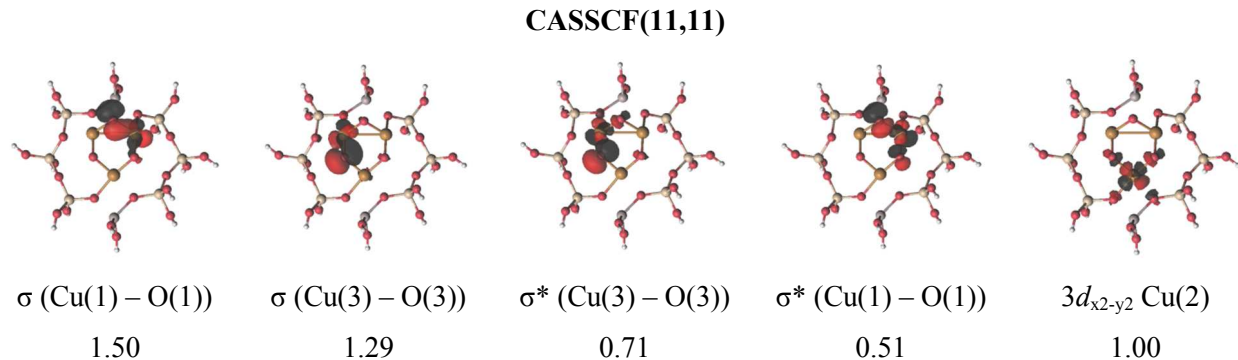

Figure S1: The five most relevant MOs of the  $[\text{Cu}_3(\mu\text{-O})_3]^{2+}$  cluster for the five most stable doublet states, as calculated from the CASSCF(11,11) level of theory. A description and their corresponding occupation numbers are given below each MO.

CASSCF(11,11) shows that Cu(2) has a pure  $d^9$  electronic configuration, while Cu(1) and Cu(3) form bonding ( $\sigma$ ) /antibonding ( $\sigma^*$ ) combinations with the  $2p$  orbitals of O(1) and O(3), respectively. The O(1) and O(3) have a partially occupied  $2p$  atomic orbital, and they have a more  $\text{O}^\cdot$  (oxyl) character. On the contrary, O(2) has the three  $2p$  orbitals as doubly occupied ( $\text{O}^{2-}$  character). This electronic configuration is similar to the one found from RASSCF(19,21).

### S3. Key orbitals of the 5 doublet states obtained from the SA(5)-RASSCF(19,21) level

In order to understand in depth the electronic structure of the  $[\text{Cu}_3(\mu\text{-O})_3]^{2+}$  cluster, the low-lying states were studied by means of state-averaged (SA) RASSCF. A preliminary SA(6)-RASSCF(19,21) calculation was performed, with the six lowest doublet states optimized with equal weights. The purpose of this calculation with an arbitrary number of optimized states was to identify how many energetically low-lying degenerate or near-degenerate states exist. It was found that the first three doublet states are within an energy range of 15 kJ/mol (Figure S2). The fourth and fifth states differ by only 3.7 kJ/mol, and they are 29.0 kJ/mol higher than the ground state. On the other hand, the sixth state is 251.2 kJ/mol higher than the ground state and can be safely excluded from the rest of our analysis.

Table S2: Relative energy differences (in kJ/mol) between the six lowest doublet states, calculated at the SA(6)-RASSCF(19,21), SA(5)-RASSCF(19,21), and MS(5)-RASPT2(19,12) levels of theory.

| State | SA(6)-RASSCF(19,21) | SA(5)-RASSCF(19,21) | MS(5)-RASPT2(19,21) |
|-------|---------------------|---------------------|---------------------|
| 1     | 0                   | 0                   | 0                   |
| 2     | 8.9                 | 9.8                 | 17.9                |
| 3     | 14.7                | 18.9                | 35.1                |
| 4     | 29.0                | 31.7                | 60.6                |
| 5     | 32.7                | 36.3                | 68.7                |
| 6     | 251.2               | -                   | -                   |

#### State 1 (Ground state)

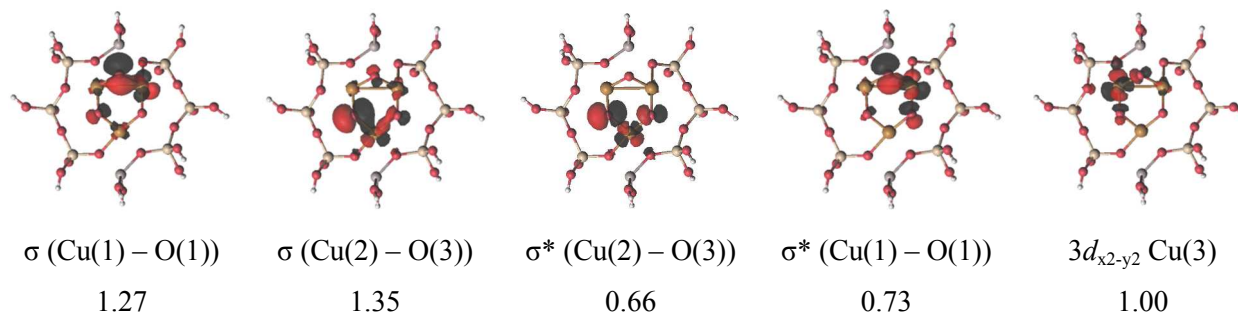

### State 2

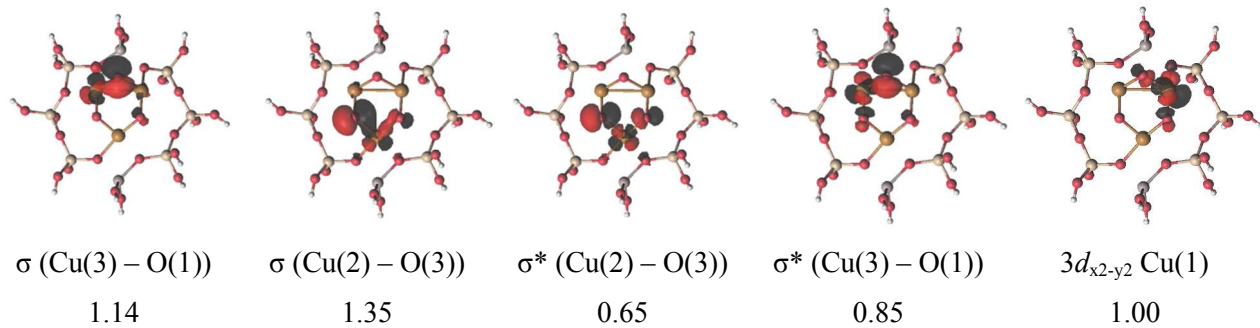

### State 3

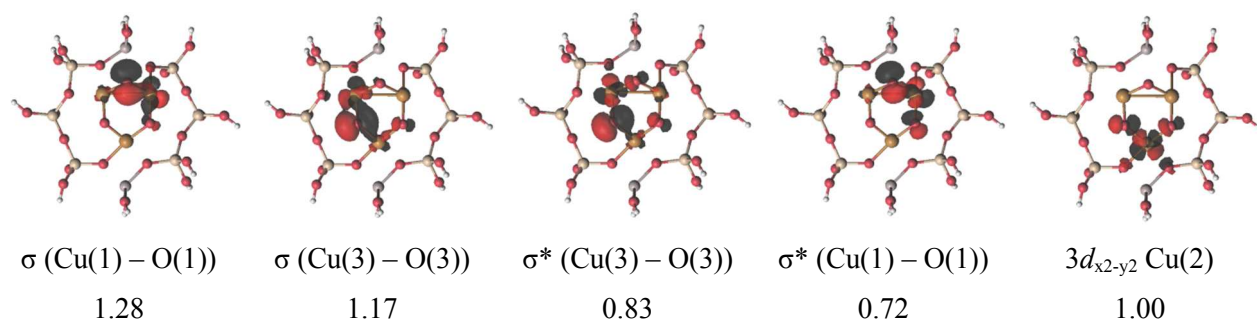

### State 4

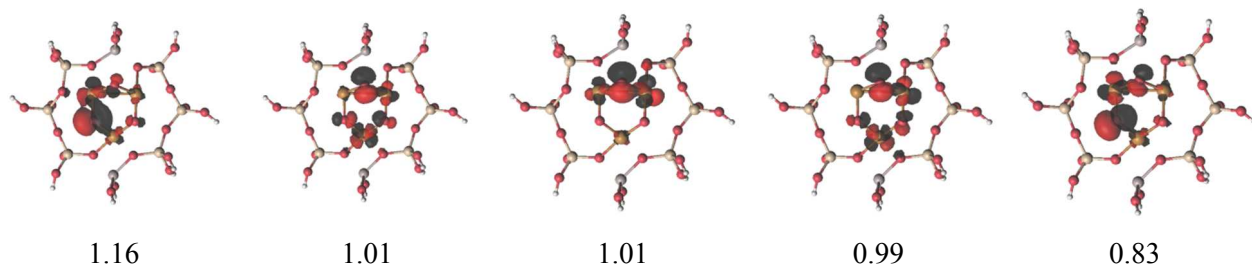

### State 5

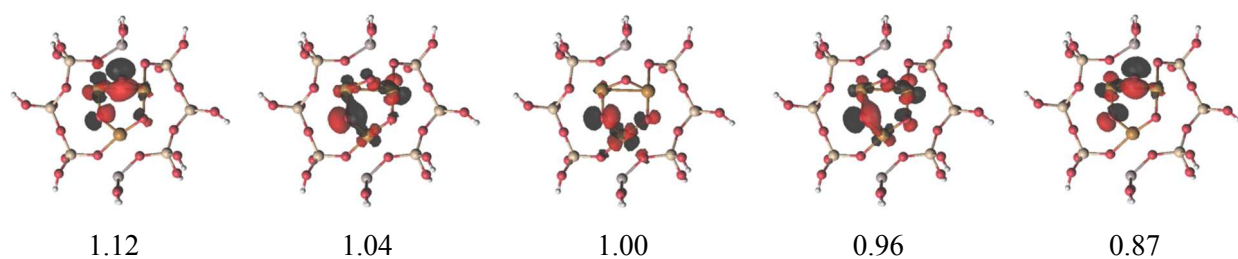

Figure S2: The five most relevant MOs of the  $[\text{Cu}_3(\mu\text{-O})_3]^{2+}$  cluster for the five most stable doublet states, as calculated from the SA(5)-RASSCF(19,21) level of theory. A description and their corresponding occupation numbers are given below each MO.



#### S4. Geometrical details of the $[\text{Cu}_3(\mu\text{-O})_3]^{2+}$ complex optimized with the PBE functional

Table S3 includes the key Cu-O, Cu-Si, and Cu-Al bond distances for both models ( $S = 3/2$  and  $S = 1/2$ ). The first observation is that the six Cu-O bond distances of the  $[\text{Cu}_3(\mu\text{-O})_3]^{2+}$  core are between 1.77 and 1.83 Å for both geometries. The Cu-O distances with the oxygen atoms of the MOR framework are significantly larger and they vary from 1.96 till 2.96 Å. This large variety of the Cu-O(MOR) distances leads to the conclusion that the three Cu centers of the  $[\text{Cu}_3(\mu\text{-O})_3]^{2+}$  core have different coordinative environments. Cu(2) and Cu(3) can be seen as tetra-coordinated cations, while Cu(1) as a tri-coordinated cation, due to the large Cu(1) – O(MOR-2) distance (2.628 and 2.955 Å for the  $S = 1/2$  and  $S = 3/2$  optimized geometries, respectively). This shift of the Cu(1) – O(MOR-2) distance is the first structural difference between the two geometries. The second geometrical difference is between the  $S = 1/2$  and  $S = 3/2$  structures. The O(1) – Cu(3) bond increases from  $S = 1.784$  Å ( $S = 1/2$  structure) to 1.830 Å ( $S = 3/2$  structure) and the O(2) – Cu(1)/ O(3) – Cu(3) bonds from 1.767 Å ( $S = 1/2$  structure) to 1.781/1.801 Å ( $S = 3/2$  structure).

Table S3: Key bond distances (in Å) for the two MOR models optimized at the doublet and quartet states. Major distortions between the two models are indicated with bold font.

| Optimized model at spin: | $S = 1/2$    | $S = 3/2$    |
|--------------------------|--------------|--------------|
| O(1) – Cu(1)             | 1.818        | 1.815        |
| O(1) – Cu(3)             | <b>1.784</b> | <b>1.830</b> |
| O(2) – Cu(1)             | 1.767        | 1.781        |
| O(2) – Cu(2)             | 1.800        | 1.810        |
| O(3) – Cu(2)             | 1.785        | 1.778        |
| O(3) – Cu(3)             | 1.767        | 1.801        |
| Cu(1) – O(MOR-1)         | 1.987        | 1.984        |
| Cu(1) – O(MOR-2)         | <b>2.628</b> | <b>2.955</b> |
| Cu(1) – Si(MOR)          | <b>2.968</b> | <b>3.105</b> |
| Cu(2) – O(MOR-1)         | 1.955        | 1.957        |
| Cu(2) – O(MOR-2)         | 2.016        | 1.993        |
| Cu(2) – Al(MOR)          | 2.746        | 2.745        |
| Cu(3) – O(MOR-1)         | <b>2.105</b> | <b>2.227</b> |
| Cu(3) – O(MOR-2)         | 2.044        | 2.080        |

Cu(3) – Si(MOR)

2.695

2.730

---

Multiconfigurational calculations were also performed for the  $S = 3/2$  structure, and the doublet was found energetically more stable than the quartet by 23.1 (CASSCF(11,11)) and 55.5 kJ/mol (CASPT2(11,11)).

## S5. Effect of the choice of the functional.

The previous discussion and analysis was based on structures obtained from periodic PBE geometries. In order to examine the effect of the density functional on the geometry and reactivity of the three ( $\mu$ -O) bridging atoms, we have performed periodic DFT geometry optimizations using six popular density functionals: B3LYP, LC-wPBE, MN12-L, M06-L, M06-2X, and PBE0. The main geometrical difference between the structures optimized with different functionals is the position of ring in the MOR framework, which in some cases was closer to the middle of the MOR channel, while in other cases closer to one side of the channel. In the latter case, the ring structure was wider than in the PBE optimized structure. The wider ring was found for the geometries optimized with M06-2X and PBE0, and it is reflected on the Cu(1)-Cu(3) bond distance (Table S4).

Table S4: Cu(1)-Cu(3) bond distance (in Å) from the structures optimized with different density functionals.

| Functional | Cu(1)-Cu(3)  |
|------------|--------------|
| PBE        | 2.740        |
| B3LYP      | 2.747        |
| LC-wPBE    | 2.712        |
| MN12-L     | 2.750        |
| M06-L      | 2.811        |
| M06-2X     | <b>2.920</b> |
| PBE0       | <b>3.011</b> |

Cluster models were used from the periodic structures and SA(5)-RASSCF(19,21) calculations were performed, by following the same process that was described for the periodic PBE geometry. A detailed analysis of the electronic configurations of the five lowest states will be skipped. On the contrary, we will be discuss the differences of the Mulliken charges for the three ( $\mu$ -O) atoms atoms (Table S5), as they were calculated at the SA(5)-RASSCF(19,21) level. The Mulliken charges by themselves are not indicative of the electronic structure of the  $[\text{Cu}_3(\mu\text{-O})_3]^{2+}$  core, but comparison with the charges obtained by the PBE structure can reveal which ( $\mu$ -O) atoms have an oxyl radical character and which has a  $\text{O}^{2-}$  character.

Table S5: Mulliken charges of the three ( $\mu$ -O) atoms calculated with SA(5)-RASSCF(19,21).

|         | O(1)           | O(2)           | O(3)    |
|---------|----------------|----------------|---------|
| PBE     | -0.5211        | <b>-0.9860</b> | -0.5320 |
| B3LYP   | -0.5284        | <b>-1.0139</b> | -0.5734 |
| LC-wPBE | -0.4930        | <b>-0.9781</b> | -0.5888 |
| MN12-L  | -0.5348        | <b>-0.9548</b> | -0.5874 |
| M06-L   | -0.5132        | <b>-0.9836</b> | -0.5718 |
| M06-2X  | <b>-1.0188</b> | -0.5377        | -0.5681 |
| PBE0    | <b>-0.9099</b> | -0.5619        | -0.5756 |

Results from B3LYP, LC-wPBE, M06-L and MN12-L agree with the conclusions extracted from the PBE structure; O(2) has an oxo character, while O(1) and O(3) have a more oxyl radical character. This was found from the electronic configurations of the five energetically lower doublet states and from the Mulliken charges. On the contrary, SA(5)-RASSCF(19,21) predicts for the two structures optimized with the M06-2X and PBE0 functionals that O(1) will have an oxo character. This result is in disagreement with previous mechanistic studies on the  $[\text{Cu}_3(\mu\text{-O})_3]^{2+}$  cluster deposited on the ZSM-5 zeolite, where O(1) is the most reactive ( $\mu$ -O) atom.<sup>1</sup>

## S6. Single point DFT energies for benchmarking the choice of the functional

The performance of a range of popular DFT methodologies was assessed by performing single-point calculations for different spin-configurations of the cluster model shown in Figure 1 using Gaussian 09.D01 program package. The (a) BLYP and PBE GGA-type functionals, (b) M06L meta-GGA, (c) MN12L and MN15L meta non-separable GGA, (d) PBE0, B3LYP, M06, M06-2X, MN15 hybrid methods, (e) LC-wPBE, CAM-B3LYP and MN12SX range-separated functionals, and (f) the B2PLYP double hybrid method were employed. The 6-311+G(d) basis set was employed for the Cu centers and its first coordination sphere, while the remaining atoms were treated with the 6-31G(d) basis set.

Single-point calculations were performed on the cluster model extracted from the fully optimized structure with periodic PBE (pPBE). Figure S3 summarizes the DFT energy differences between the doublet-quartet and doublet-sextet states. The RASPT2(19,21) energy differences were used as benchmark values and are shown in Figure S3 with pink and grey stars. From the functionals included in this study, the PBE, BLYP and MN12L functionals provided energies in good agreement with RASPT2(19,21). While PBE and BLYP results are almost identical to the CASPT2 energies, MN12L overestimates the doublet-sextet difference, similarly to the RASPT2(19,21) energies. Most of the remaining functionals predict a quartet state as the ground state of the system, while, in some cases, they estimate the sextet state as more stable than the doublet.

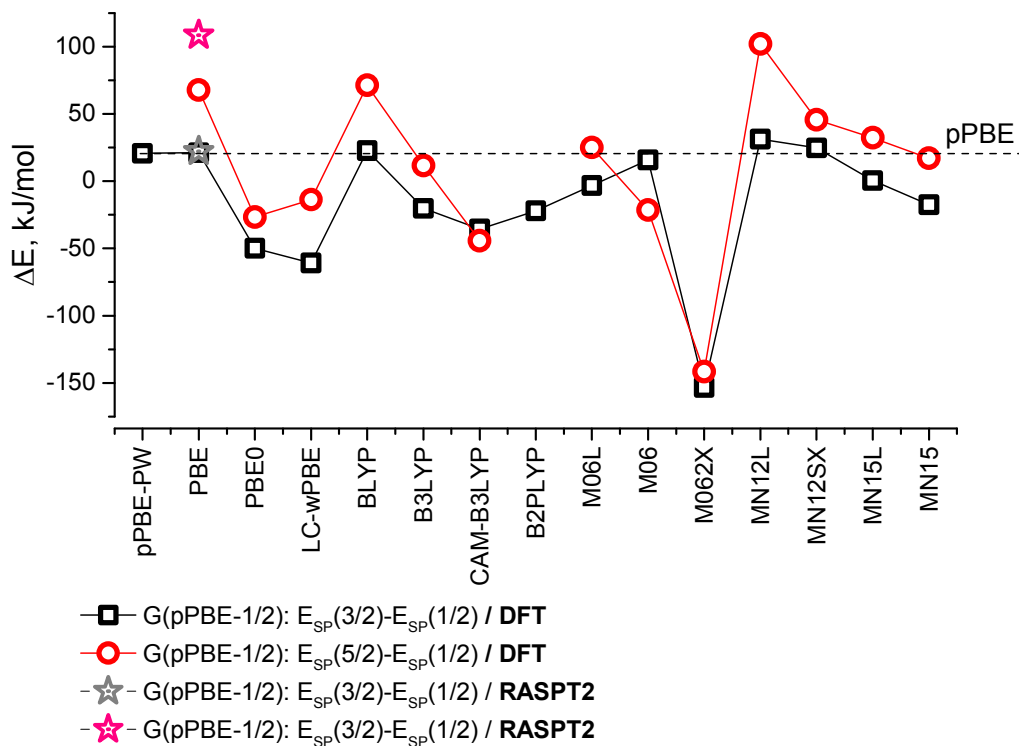

Figure S3: DFT-computed energy differences between the doublet-quartet ( $E_{SP}(3/2) - E_{SP}(1/2)$ , squares) and doublet-sextet ( $E_{SP}(3/2) - E_{SP}(1/2)$ , circles) states of the  $Cu_3O_3/MOR$  cluster model constructed from the fully optimized periodic structure in the doublet state (G(pPBE-1/2)). The respective benchmark values computed at the RASPT2(19,21) level are shown as stars.

### S7. Cartesian coordinates of the $[\text{Cu}_3\mu\text{-O}]_3^{2+}$ cluster

|    |            |            |            |
|----|------------|------------|------------|
| Al | 0.4914320  | 4.1305720  | 0.1700210  |
| Al | -0.4058980 | -3.7891180 | -0.0869720 |
| Cu | 0.1535390  | 1.5971530  | -0.8340780 |
| Cu | 1.2087780  | -1.2384200 | -1.1632530 |
| Cu | -1.5134800 | -0.9424020 | -1.0640560 |
| O  | -0.2761380 | -1.6891230 | -2.1096210 |
| O  | -1.2745900 | 0.7541910  | -1.4944310 |
| O  | 1.3495280  | 0.4738020  | -1.5746530 |
| O  | -3.3909620 | -0.7649380 | -0.1278780 |
| O  | -1.7585540 | -2.6204640 | 0.0773900  |
| O  | 1.1467360  | -2.8746850 | -0.0368580 |
| O  | 3.3898140  | -1.7343410 | 0.2157580  |
| O  | 1.5780530  | 2.7103960  | -0.0895610 |
| O  | -0.9261350 | 3.0113890  | 0.1128150  |
| O  | 0.4150520  | 5.0999940  | -1.2254090 |
| O  | 0.7309260  | 4.9186420  | 1.6622140  |
| O  | 2.2487960  | -2.7647600 | 2.4096910  |
| O  | 3.3550310  | -4.3561980 | 0.6030420  |
| O  | 3.4541370  | 0.8538610  | 0.4005300  |
| O  | 3.6851890  | 2.4191850  | -1.7508510 |
| O  | 4.0169940  | 3.4143630  | 0.6358670  |
| O  | 4.5985860  | -0.5351600 | 2.3086420  |
| O  | 5.7163840  | -0.5605370 | -0.0854900 |
| O  | -0.3350620 | -4.8153850 | 1.2980200  |
| O  | -0.5668170 | -4.5852330 | -1.5912010 |
| O  | -2.6551090 | 3.4390180  | 2.0952040  |
| O  | -3.1479050 | 4.4495150  | -0.3124840 |
| O  | -3.3486620 | 1.8573010  | 0.0923360  |
| O  | -3.8337930 | 0.3398140  | 2.2434080  |

|    |            |            |            |
|----|------------|------------|------------|
| O  | -4.0565620 | -2.7214270 | 1.5989560  |
| O  | -4.1214040 | -3.1377210 | -1.0476590 |
| O  | -5.6429830 | 0.5842880  | 0.2680940  |
| H  | 1.1697698  | 5.4805353  | -1.7055073 |
| H  | 0.7790358  | 5.8911052  | 1.6935194  |
| H  | 1.5850398  | -3.3750630 | 2.8008807  |
| H  | 3.5584040  | -4.6521111 | -0.3051051 |
| H  | 3.2246535  | 1.7866995  | -2.3452205 |
| H  | 3.6223892  | 3.7351206  | 1.4706353  |
| H  | 3.9243663  | -0.9398843 | 2.8935953  |
| H  | 6.3198062  | 0.2060974  | -0.0426859 |
| H  | -0.2662165 | -5.7815714 | 1.1999888  |
| H  | -0.4165428 | -4.0781799 | -2.4122428 |
| H  | -1.9980263 | 4.0473491  | 2.4946626  |
| H  | -2.6847109 | 4.7393970  | -1.1251503 |
| H  | -3.6535439 | 1.1523578  | 2.7659441  |
| H  | -3.9173080 | -2.1053621 | 2.3504593  |
| H  | -3.6324828 | -3.8697479 | -1.4801866 |
| H  | -5.9078585 | 0.6347342  | -0.6702966 |
| Si | 2.5309970  | -2.9917010 | 0.8327990  |
| Si | 3.1735530  | 2.3185970  | -0.2185750 |
| Si | 4.3074900  | -0.4800420 | 0.7176820  |
| Si | -2.5170730 | 3.1814010  | 0.4947890  |
| Si | -3.3797500 | -2.4169240 | 0.2021180  |
| Si | -4.0974400 | 0.5401190  | 0.6603480  |



## S8. Structures Optimized with Periodic DFT

### A. O(1) Initial geometry ([Cu<sub>3</sub>( $\mu$ -O)<sub>3</sub>]-MOR + CH<sub>4</sub>)

```
data_CONTCAR\9
_cell_length_a 13.647600
_cell_length_b 13.647600
_cell_length_c 15.015100
_cell_angle_alpha 90.000000
_cell_angle_beta 90.000000
_cell_angle_gamma 97.178902
loop_
_symmetry_equiv_pos_as_xyz
+x,+y,+z
loop_
_atom_site_type_symbol
_atom_site_label
_atom_site_fract_x
_atom_site_fract_y
_atom_site_fract_z
O O 0.1857077719417934 0.0320997019449833 0.2249222889657061
O O 0.2147439506817260 0.9973941573702036 0.7269526472165367
O O 0.4254677331116584 0.7987933697149772 0.2137731815475636
O O 0.4224720585051985 0.8076406441992540 0.7272516896732514
O O 0.6355114239769827 0.8871088938851606 0.5111999132658953
O O 0.6015544580629709 0.8590514659287548 0.0493652187734619
O O 0.8015699581985456 0.0084987575537827 0.4718485786952636
O O 0.7496110579939194 0.9773125856601766 0.9779050754595492
O O 0.6033482216342608 0.1873056385608099 0.4766801429320838
O O 0.5939190679899291 0.1986449968369337 0.9833485829012031
O O 0.3661465666100006 0.1229405306369132 0.2463737784131824
O O 0.3702093151215902 0.1331063233678381 0.7370887381526272
O O 0.9417180583068739 0.8027691577637965 0.0476077374775259
O O 0.9657441741642397 0.7545181817698571 0.5511924784032020
O O 0.1816675710557806 0.5731297193955526 0.0198340733791369
O O 0.1830552884155855 0.5756220426850122 0.5196924692132359
O O 0.1703608840380190 0.3970801401351769 0.2289220977073672
O O 0.1310577387911524 0.3603584940895312 0.7520378893833345
O O 0.0309714731364289 0.2515533655205057 0.2820953228428581
O O 0.0052325998442097 0.1990555901347736 0.7842733578072525
O O 0.8139426474713157 0.4401610372072950 0.2874925954962200
O O 0.8306959785189305 0.4232535742360005 0.7809987867533003
O O 0.8515435671239863 0.6241069582956885 0.0057332906176679
O O 0.8169454597904922 0.6259565418094474 0.4922038591216054
O O 0.8047761515674928 0.9503571065348152 0.3030200014622060
O O 0.7733830350699323 0.9551426339361186 0.8047500737867392
```

|   |   |                    |                    |                    |
|---|---|--------------------|--------------------|--------------------|
| O | O | 0.5424871240569810 | 0.1811036571535361 | 0.3092483194886467 |
| O | O | 0.5425028778123863 | 0.1947297299773200 | 0.8113854883800969 |
| O | O | 0.4007330673133134 | 0.1619309686180420 | 0.9944250864066883 |
| O | O | 0.3852451347709583 | 0.1655834037882443 | 0.4994330454568298 |
| O | O | 0.2434578783704025 | 0.0471705198346315 | 0.0538138643237253 |
| O | O | 0.2269880411712602 | 0.0436620983862487 | 0.5546755651138922 |
| O | O | 0.4091974655419902 | 0.8413002097144716 | 0.0368854252368837 |
| O | O | 0.4572803233089998 | 0.8059011488559078 | 0.5532915969497273 |
| O | O | 0.6324848384356258 | 0.8474606023695531 | 0.2574933201039128 |
| O | O | 0.6232849302956535 | 0.8440952877322760 | 0.7293889253788222 |
| O | O | 0.0252967613306764 | 0.1977286847542355 | 0.4548791718856762 |
| O | O | 0.0372327114129874 | 0.2037910777810800 | 0.9602973392205248 |
| O | O | 0.7841084520568767 | 0.4317782873916416 | 0.4627525481758556 |
| O | O | 0.8075425484211951 | 0.4396183090434858 | 0.9567699373983294 |
| O | O | 0.9028179597145117 | 0.6181183803140372 | 0.2446893786846529 |
| O | O | 0.8790460646646236 | 0.6149356591261022 | 0.7611102396854507 |
| O | O | 0.9949448186905300 | 0.7962776456791284 | 0.2186267691624994 |
| O | O | 0.9881852105195117 | 0.7882469876314565 | 0.7244540099399022 |
| O | O | 0.1536406528489238 | 0.5871625013152554 | 0.1974648812286054 |
| O | O | 0.1958443910207695 | 0.5405112580969746 | 0.6949543643162585 |
| O | O | 0.1038357036018264 | 0.3763235058017557 | 0.5081896602865105 |
| O | O | 0.1315695602765393 | 0.3836172183840501 | 0.9887312815491942 |
| O | O | 0.2789820294371433 | 0.8938603722187988 | 0.1534921886348763 |
| O | O | 0.2996232839286927 | 0.8832263670711179 | 0.6127174532489273 |
| O | O | 0.6925155763193943 | 0.0876451193869234 | 0.3522868171322112 |
| O | O | 0.6958882264824353 | 0.1086490777614050 | 0.8620576482964416 |
| O | O | 0.1008658509449093 | 0.7227127863058874 | 0.0890345005975214 |
| O | O | 0.1171839016934323 | 0.6967652587698082 | 0.6378206012602972 |
| O | O | 0.9026545546633279 | 0.3165811377198855 | 0.3909479311358188 |
| O | O | 0.8921598666673448 | 0.2910646925953460 | 0.8918911052515629 |
| O | O | 0.2436652051671432 | 0.0892247885024949 | 0.3861077523023663 |
| O | O | 0.2624966134230276 | 0.0809621314376400 | 0.8820064006879480 |
| O | O | 0.4891338231000707 | 0.8561468241542570 | 0.3924730305761591 |
| O | O | 0.5196933451658212 | 0.8727190743876323 | 0.8913412926911948 |
| O | O | 0.7712200367862465 | 0.9023667475121363 | 0.1350303164127259 |
| O | O | 0.7761014806198137 | 0.9287892381027786 | 0.6307222053294524 |
| O | O | 0.5165438434941351 | 0.1520736261990065 | 0.1382343928917109 |
| O | O | 0.5288796778000765 | 0.1668142757028570 | 0.6395837291582417 |
| O | O | 0.9307680997917458 | 0.7459042124360593 | 0.3797452584373347 |
| O | O | 0.9052905681406055 | 0.7584212604233816 | 0.8805825610596155 |
| O | O | 0.1365996655578428 | 0.5183700531401990 | 0.3646168917354598 |
| O | O | 0.1230570722954218 | 0.5139152509411050 | 0.8578609074337282 |
| O | O | 0.1021019481747137 | 0.2508684619618715 | 0.1203987326014635 |
| O | O | 0.0703460632738765 | 0.2282092662634601 | 0.6236915276126388 |
| O | O | 0.8632733588790052 | 0.4797439637268032 | 0.1213218557369373 |
| O | O | 0.8394832299900341 | 0.4973437743151431 | 0.6213213859019114 |

|    |    |                    |                    |                    |
|----|----|--------------------|--------------------|--------------------|
| O  | O  | 0.2181523650790815 | 0.2234509665887632 | 0.2610507562765297 |
| O  | O  | 0.1954816113229673 | 0.1892062706483073 | 0.7528144324723028 |
| O  | O  | 0.7583690831598551 | 0.7827883009772265 | 0.9912723908872714 |
| O  | O  | 0.8010884768866822 | 0.8141182533546544 | 0.4902425223191165 |
| O  | O  | 0.7984501400672795 | 0.7653340009988071 | 0.2523692189606093 |
| O  | O  | 0.7927318110899280 | 0.7749341107197756 | 0.7380545437611573 |
| O  | O  | 0.2296785343207645 | 0.2287468984270379 | 0.9902758142399705 |
| O  | O  | 0.2130007099053117 | 0.2285298498578968 | 0.5044208559070864 |
| O  | O  | 0.5102449904182985 | 0.0157960222177928 | 0.0090631809716951 |
| O  | O  | 0.4892960903306435 | 0.0004991796543504 | 0.5190941725008017 |
| O  | O  | 0.9944847317202468 | 0.5079877896070069 | 0.9898833501675438 |
| O  | O  | 0.9685071667258699 | 0.5247768615714127 | 0.4863023443326894 |
| O  | O  | 0.4978709837166611 | 0.9960780155320170 | 0.2461822812767105 |
| O  | O  | 0.5102566705195777 | 0.0097187204930055 | 0.7452828678287468 |
| O  | O  | 0.0002652827565030 | 0.4626060917593139 | 0.2438948778625298 |
| O  | O  | 0.0052170689773380 | 0.4898479531858361 | 0.7141557371503938 |
| O  | O  | 0.0963861383855966 | 0.9161646486789038 | 0.1027783397273096 |
| O  | O  | 0.1065781919102723 | 0.8888630398126137 | 0.6085633451277599 |
| O  | O  | 0.2913609706932191 | 0.7030037447871038 | 0.1178990432335172 |
| O  | O  | 0.3097783017997628 | 0.6889375315666642 | 0.6220105581783222 |
| O  | O  | 0.8877167032611040 | 0.1259942948202591 | 0.3438830412048710 |
| O  | O  | 0.8855781466080513 | 0.0939759048251505 | 0.8931110027722952 |
| O  | O  | 0.7115350796234038 | 0.2848742229018741 | 0.3525088440912391 |
| O  | O  | 0.7005029087273388 | 0.3040321681964219 | 0.8630712197836993 |
| O  | O  | 0.3234544801251211 | 0.5579635678701277 | 0.3044560688122189 |
| O  | O  | 0.5176480137405155 | 0.6721931450043181 | 0.3223248420161380 |
| O  | O  | 0.3814604019255214 | 0.6052506379005073 | 0.4668734842046252 |
| Si | Si | 0.5036571280559903 | 0.1304144834082386 | 0.0334477611994208 |
| Si | Si | 0.7207662759509906 | 0.8792694287366487 | 0.0387803047328031 |
| Si | Si | 0.7539756759714155 | 0.9101776169871915 | 0.5242721995858812 |
| Si | Si | 0.2544232930771922 | 0.1169593995849719 | 0.2815832229001229 |
| Si | Si | 0.2589368982761870 | 0.1002542401442566 | 0.7754051524744265 |
| Si | Si | 0.8948720888090850 | 0.5014786721800997 | 0.2242572420760934 |
| Si | Si | 0.8895655598532756 | 0.5071702385274514 | 0.7186866340899338 |
| Si | Si | 0.1295543039291117 | 0.2796208001435878 | 0.2232027456118397 |
| Si | Si | 0.1011247969928895 | 0.2445582506772847 | 0.7266828239777183 |
| Si | Si | 0.1072374532682463 | 0.4933746185031718 | 0.9637005521970673 |
| Si | Si | 0.8789646001787658 | 0.7348525159700603 | 0.4773234405779982 |
| Si | Si | 0.8641219650652224 | 0.7403592744877784 | 0.9815883269785900 |
| Si | Si | 0.5192486619067340 | 0.8958014871681304 | 0.4934536100347253 |
| Si | Si | 0.5107604003565779 | 0.8978950790786147 | 0.9944794209121528 |
| Si | Si | 0.2695985365802506 | 0.1323776790851733 | 0.4862174366309968 |
| Si | Si | 0.2835178402406995 | 0.1294505616048416 | 0.9805839154071889 |
| Si | Si | 0.4817214178280866 | 0.1094659301679451 | 0.2365388644411331 |
| Si | Si | 0.4855473985407653 | 0.1200482984447280 | 0.7395868856789929 |
| Si | Si | 0.7476334929497467 | 0.8664224794360013 | 0.2376694348729680 |

|    |    |                    |                    |                    |
|----|----|--------------------|--------------------|--------------------|
| Si | Si | 0.7485037637293014 | 0.8783130734366316 | 0.7258114896012439 |
| Si | Si | 0.1179717288411148 | 0.4919622213726559 | 0.2584529677311610 |
| Si | Si | 0.1129370489571528 | 0.4751253865540102 | 0.7553372915290185 |
| Si | Si | 0.9056993833560609 | 0.7323780595398615 | 0.2741634007199236 |
| Si | Si | 0.8925905477536625 | 0.7329840884156378 | 0.7760477880224583 |
| Si | Si | 0.8806024355501219 | 0.5134919597531115 | 0.0187474514017865 |
| Si | Si | 0.8544806376563964 | 0.5189512423575435 | 0.5149886969463529 |
| Si | Si | 0.1254040660912120 | 0.2678602054956459 | 0.0154135549926028 |
| Si | Si | 0.2020820191765282 | 0.9735063692000542 | 0.1332534462658611 |
| Si | Si | 0.2130555561957452 | 0.9541093790151930 | 0.6249827007650308 |
| Si | Si | 0.3520746792657150 | 0.8132613393925795 | 0.1290622827921092 |
| Si | Si | 0.3703571691653544 | 0.7980862470566608 | 0.6316150650610068 |
| Si | Si | 0.7965462523162059 | 0.0436520171799983 | 0.3674427584618740 |
| Si | Si | 0.7761882025086659 | 0.0347441777947360 | 0.8860337474931093 |
| Si | Si | 0.6336378654295777 | 0.2004656103044757 | 0.8820144997775927 |
| Si | Si | 0.0334627405745536 | 0.8087564810195977 | 0.1160506388224330 |
| Si | Si | 0.0451175713014253 | 0.7821386676242095 | 0.6294447087263130 |
| Si | Si | 0.1802421581051580 | 0.6456948868277855 | 0.1053752402744271 |
| Si | Si | 0.2021067199380151 | 0.6258774687186749 | 0.6187727495346576 |
| Si | Si | 0.9620948414251668 | 0.2234369014470879 | 0.3684400034520885 |
| Si | Si | 0.9554092889541190 | 0.1982427639680093 | 0.8820337213686986 |
| Si | Si | 0.8025686547099984 | 0.3678084991270545 | 0.3737433107489549 |
| Si | Si | 0.8092574186928139 | 0.3644363822584533 | 0.8735902054933173 |
| Si | Si | 0.1038965949748750 | 0.2603853607368081 | 0.5222105942766102 |
| Si | Si | 0.6378551636708725 | 0.1854669633825545 | 0.3743196787715192 |
| Al | Al | 0.0836478325994184 | 0.4910530415062066 | 0.4735900919533523 |
| Al | Al | 0.5168742099622691 | 0.8789811455299570 | 0.2760831819313641 |
| Al | Al | 0.5088491543440053 | 0.8893671334001325 | 0.7801228625198766 |
| Al | Al | 0.4966922129460076 | 0.1273407570890102 | 0.5222917696869382 |
| Cu | Cu | 0.2667570656375304 | 0.5683612691512326 | 0.4119605972622810 |
| Cu | Cu | 0.4594299111131321 | 0.7097492245019609 | 0.4241176739770145 |
| Cu | Cu | 0.3989362097798785 | 0.6639200637696727 | 0.2621351025257107 |
| C  | C  | 0.5854752741128871 | 0.4759854814974018 | 0.3265210683386371 |
| H  | H  | 0.5843498544126623 | 0.2193388595983485 | 0.6411136505117142 |
| H  | H  | 0.6010899484959642 | 0.7831976177358427 | 0.6968667112194900 |
| H  | H  | 0.5387685053807821 | 0.4091227978040014 | 0.3048636978369921 |
| H  | H  | 0.6452920580905530 | 0.4959070357730564 | 0.2787230217896556 |
| H  | H  | 0.5409280404795428 | 0.5380354376865588 | 0.3303993258929893 |
| H  | H  | 0.6162042981215614 | 0.4654945227254899 | 0.3927933951294534 |

B. O(1) Transition state ([Cu<sub>3</sub>(μ-O)<sub>3</sub>]-MOR•••CH<sub>4</sub>)

data\_OSiAlCuCH  
 \_cell\_length\_a 13.647600  
 \_cell\_length\_b 13.647600

```

_cell_length_c 15.015100
_cell_angle_alpha 90.000000
_cell_angle_beta 90.000000
_cell_angle_gamma 97.178902
loop_
_symmetry_equiv_pos_as_xyz
+x,+y,+z
loop_
_atom_site_type_symbol
_atom_site_label
_atom_site_fract_x
_atom_site_fract_y
_atom_site_fract_z
O O 0.1876686034626402 0.0311335886915529 0.2266553526438813
O O 0.2139342570446203 0.9962458832906478 0.7273385172487039
O O 0.4272490678569412 0.7948478637966403 0.2154515867957372
O O 0.4217092840033985 0.8074673996752679 0.7277678405587622
O O 0.6358407161601036 0.8892689598550376 0.5121025996606292
O O 0.6029609162431342 0.8615009525951933 0.0497058200948501
O O 0.8036696815575581 0.0078129262555677 0.4721547247176048
O O 0.7508354517608353 0.9788547427592462 0.9782395976939213
O O 0.6034432116723494 0.1869649784703853 0.4766568747652329
O O 0.5929871822015045 0.1987517655049231 0.9825744109820462
O O 0.3686071055166380 0.1219668654695667 0.2462928118198278
O O 0.3697764702053803 0.1318533849157504 0.7379359541770327
O O 0.9433754540521946 0.8034437946405930 0.0465721463617896
O O 0.9649720505553319 0.7553677669056640 0.5511554546344541
O O 0.1828290572782905 0.5726644629376736 0.0200074079529671
O O 0.1846230525654988 0.5740219469993733 0.5193415286803997
O O 0.1710919741383776 0.3959635544616091 0.2275038070769497
O O 0.1334438738702417 0.3600233675427376 0.7511916661364282
O O 0.0340034117785990 0.2498921443112820 0.2827910151132471
O O 0.0049043366415091 0.2010113572471894 0.7843112126239546
O O 0.8129817816284159 0.4389039290674148 0.2871221363945580
O O 0.8304723242565899 0.4228914559997392 0.7803874934811219
O O 0.8515921003929137 0.6245784083262151 0.0073107311390928
O O 0.8181630575586638 0.6252748030280486 0.4912606772980297
O O 0.8057076651708215 0.9490118625170254 0.3036232538014332
O O 0.7716393097358534 0.9548911558197517 0.8048077786660528
O O 0.5451779892897832 0.1806360515000591 0.3076775923820065
O O 0.5428158870416979 0.1952694038832661 0.8104537089827133
O O 0.4000783022497600 0.1630855938214069 0.9947727276182761
O O 0.3866126019442433 0.1673867319013240 0.5015243855002396
O O 0.2445462980123736 0.0470164737058596 0.0554665207890466
O O 0.2278477883912942 0.0442442102336997 0.5553948788537539
O O 0.4112975562765868 0.8401425473589299 0.0386003530888743

```

|   |   |                    |                    |                    |
|---|---|--------------------|--------------------|--------------------|
| O | O | 0.4581164268684859 | 0.8065697324270360 | 0.5545144509685542 |
| O | O | 0.6337037391120717 | 0.8459905919055117 | 0.2569056231801810 |
| O | O | 0.6231625087941879 | 0.8438108949550980 | 0.7282336633927216 |
| O | O | 0.0260626079127491 | 0.1963218639988398 | 0.4553440998265756 |
| O | O | 0.0361052251099707 | 0.2040682146633941 | 0.9608012298049502 |
| O | O | 0.7859504043827528 | 0.4319749955291883 | 0.4623191029324119 |
| O | O | 0.8083300609631365 | 0.4406913509942143 | 0.9563851354751733 |
| O | O | 0.9029116711716938 | 0.6164380555563653 | 0.2460602656117388 |
| O | O | 0.8793202953044670 | 0.6144881454533646 | 0.7602201258786536 |
| O | O | 0.9954172218145771 | 0.7943309678131740 | 0.2177821060111569 |
| O | O | 0.9887526088596985 | 0.7878177755039033 | 0.7241585147652074 |
| O | O | 0.1538453876270438 | 0.5864010285344037 | 0.1972400620495733 |
| O | O | 0.1962460817003304 | 0.5410791916806517 | 0.6952447309269232 |
| O | O | 0.1036426679318296 | 0.3748046978800517 | 0.5086412466851726 |
| O | O | 0.1307285226090542 | 0.3831124054301611 | 0.9907025324492906 |
| O | O | 0.2819384842847867 | 0.8934473095084883 | 0.1549995248749667 |
| O | O | 0.2998965878619160 | 0.8835700102294624 | 0.6127675407601458 |
| O | O | 0.6942857215640146 | 0.0873664299491708 | 0.3532268734008142 |
| O | O | 0.6969078477402775 | 0.1103140167288004 | 0.8620566381227306 |
| O | O | 0.1020937674561466 | 0.7222494307631919 | 0.0883891249057385 |
| O | O | 0.1164658369962055 | 0.6958062483448728 | 0.6360383863774075 |
| O | O | 0.9041242698979985 | 0.3156611289605635 | 0.3898212677943178 |
| O | O | 0.8907943244297201 | 0.2905446843182276 | 0.8923634953190103 |
| O | O | 0.2468070331347576 | 0.0898187509863462 | 0.3870189756211388 |
| O | O | 0.2626138555893149 | 0.0784250060715408 | 0.8830975594585766 |
| O | O | 0.4923165808823313 | 0.8487709632414138 | 0.3920188666298401 |
| O | O | 0.5204304636220485 | 0.8703240115279911 | 0.8912959329981760 |
| O | O | 0.7728511903722648 | 0.9026996583830424 | 0.1353527998201187 |
| O | O | 0.7773982688908774 | 0.9280370893649064 | 0.6307314121666678 |
| O | O | 0.5178241863987623 | 0.1487331895971238 | 0.1369733691969799 |
| O | O | 0.5292362829943329 | 0.1642769139476030 | 0.6394492188374130 |
| O | O | 0.9311148078619667 | 0.7463539549505072 | 0.3795651193113017 |
| O | O | 0.9057676089266806 | 0.7570002175482173 | 0.8804391479346165 |
| O | O | 0.1389952227759181 | 0.5164379900228937 | 0.3638683676767656 |
| O | O | 0.1247082798154366 | 0.5124394654073825 | 0.8585207185096593 |
| O | O | 0.1039502307287279 | 0.2479498934889719 | 0.1209531595045874 |
| O | O | 0.0713845036404805 | 0.2266375689536275 | 0.6241494583619556 |
| O | O | 0.8641361051788579 | 0.4791510764673959 | 0.1214950395441150 |
| O | O | 0.8426288329213421 | 0.4970959233001651 | 0.6202826332769646 |
| O | O | 0.2216204631033420 | 0.2230432217307481 | 0.2612153893409257 |
| O | O | 0.1947433325241406 | 0.1874333002807873 | 0.7548711712053375 |
| O | O | 0.7595384376383407 | 0.7841744965463064 | 0.9912108268873325 |
| O | O | 0.7995511797519370 | 0.8128271488505874 | 0.4897362671770225 |
| O | O | 0.7992835916666721 | 0.7640021811077915 | 0.2516347274516590 |
| O | O | 0.7931243224920195 | 0.7748203124965372 | 0.7385440901184950 |
| O | O | 0.2287933119166894 | 0.2277411873832094 | 0.9888563704564106 |

|    |    |                    |                    |                    |
|----|----|--------------------|--------------------|--------------------|
| O  | O  | 0.2141765736460854 | 0.2287835881588478 | 0.5047047845955674 |
| O  | O  | 0.5080276909126908 | 0.0154268464139307 | 0.0053940167976521 |
| O  | O  | 0.4874039470050420 | 0.9994495296891373 | 0.5126378648297774 |
| O  | O  | 0.9951469029934756 | 0.5091272170107075 | 0.9896935408106202 |
| O  | O  | 0.9709327289971128 | 0.5245635604387289 | 0.4841374556596065 |
| O  | O  | 0.4992291452545743 | 0.9942318578638165 | 0.2476375740081096 |
| O  | O  | 0.5102656012831304 | 0.0091815029178974 | 0.7463589428514155 |
| O  | O  | 0.0007608527812977 | 0.4613792741359362 | 0.2445857114423760 |
| O  | O  | 0.0060967858237504 | 0.4886593047535968 | 0.7158219288186558 |
| O  | O  | 0.0987000485907785 | 0.9153047830648333 | 0.1041783904362319 |
| O  | O  | 0.1067856467522859 | 0.8886871567220567 | 0.6078542728714993 |
| O  | O  | 0.2925154348474095 | 0.7022389561131064 | 0.1188490435360237 |
| O  | O  | 0.3093784729780467 | 0.6893597163375134 | 0.6213404379222354 |
| O  | O  | 0.8890424929960190 | 0.1250765158171845 | 0.3435309461235363 |
| O  | O  | 0.8862332759662408 | 0.0934753071707348 | 0.8915175647045999 |
| O  | O  | 0.7117774281438258 | 0.2851257234938203 | 0.3536757401691943 |
| O  | O  | 0.6996818657948580 | 0.3057403528536611 | 0.8634141481485642 |
| O  | O  | 0.3268214809647036 | 0.5500682324846311 | 0.3048242615830600 |
| O  | O  | 0.5226585889610078 | 0.6582426326495471 | 0.3198573381063072 |
| O  | O  | 0.3858548941071637 | 0.5975335087440798 | 0.4670763957371388 |
| Si | Si | 0.5027979236764537 | 0.1296470290922613 | 0.0318966329132166 |
| Si | Si | 0.7220979821577345 | 0.8807054471799347 | 0.0390661257025187 |
| Si | Si | 0.7544245272712828 | 0.9099612277436862 | 0.5243536808724087 |
| Si | Si | 0.2571322513970529 | 0.1162378059816476 | 0.2822433247378981 |
| Si | Si | 0.2584989142122538 | 0.0983588440955572 | 0.7766253581076654 |
| Si | Si | 0.8952833079554594 | 0.5000294040046711 | 0.2247866663474056 |
| Si | Si | 0.8906194381706527 | 0.5065331880248038 | 0.7185298424109305 |
| Si | Si | 0.1323777668024917 | 0.2779648145494065 | 0.2233993498742706 |
| Si | Si | 0.1017282793243766 | 0.2441677571415042 | 0.7271134119312634 |
| Si | Si | 0.1077872269589193 | 0.4930160624371354 | 0.9643171703726665 |
| Si | Si | 0.8788547403897198 | 0.7348557816823345 | 0.4769725413584212 |
| Si | Si | 0.8647515678834665 | 0.7405688923303799 | 0.9816183021612659 |
| Si | Si | 0.5191303822812117 | 0.8939552019392849 | 0.4919802297708884 |
| Si | Si | 0.5112967506787527 | 0.8974324502012294 | 0.9939917332730985 |
| Si | Si | 0.2714438242255142 | 0.1330276566091086 | 0.4873913121405025 |
| Si | Si | 0.2831561464173546 | 0.1285772577144826 | 0.9811378670378588 |
| Si | Si | 0.4841024108871252 | 0.1077552354626548 | 0.2359160308241783 |
| Si | Si | 0.4853182260729909 | 0.1193663155602351 | 0.7399008724508889 |
| Si | Si | 0.7487769810126821 | 0.8654099492738325 | 0.2377059162046535 |
| Si | Si | 0.7484198657025161 | 0.8778229620348412 | 0.7256706431065680 |
| Si | Si | 0.1189751604017459 | 0.4908554317527063 | 0.2579961326798426 |
| Si | Si | 0.1145271177210034 | 0.4744896481449388 | 0.7558071864497649 |
| Si | Si | 0.9064733322882077 | 0.7311477413425820 | 0.2740855417389412 |
| Si | Si | 0.8931422775036779 | 0.7324669142001881 | 0.7757613521442082 |
| Si | Si | 0.8813030004381019 | 0.5138716491770197 | 0.0190478573748294 |
| Si | Si | 0.8574815602530776 | 0.5191449643991533 | 0.5139656647877757 |

|    |    |                    |                    |                    |
|----|----|--------------------|--------------------|--------------------|
| Si | Si | 0.1251520534815000 | 0.2669605649837834 | 0.0158824600098981 |
| Si | Si | 0.2043801727824857 | 0.9726125189524168 | 0.1350274440625228 |
| Si | Si | 0.2131111193226403 | 0.9539832685435456 | 0.6250080722731965 |
| Si | Si | 0.3545128442604550 | 0.8119083403909713 | 0.1309867514143050 |
| Si | Si | 0.3704429823660647 | 0.7981654755519472 | 0.6316657167106285 |
| Si | Si | 0.7980756605654378 | 0.0426205216525375 | 0.3677465846349506 |
| Si | Si | 0.7763352613779233 | 0.0352437192935326 | 0.8856665723834567 |
| Si | Si | 0.6336033176727156 | 0.2015613153896467 | 0.8815480051692788 |
| Si | Si | 0.0345675871558555 | 0.8081759367315584 | 0.1154445035186527 |
| Si | Si | 0.0453199869077494 | 0.7819842216748327 | 0.6287850301473696 |
| Si | Si | 0.1814953203170049 | 0.6454113903256413 | 0.1055189926382525 |
| Si | Si | 0.2021648103464528 | 0.6254274021573849 | 0.6179980393121554 |
| Si | Si | 0.9638005960833240 | 0.2221610321666461 | 0.3683140603402535 |
| Si | Si | 0.9549372266933531 | 0.1985043878917310 | 0.8819295224755095 |
| Si | Si | 0.8039640137732462 | 0.3669756425048973 | 0.3739999472951681 |
| Si | Si | 0.8091430325155500 | 0.3649342557321162 | 0.8734587575088284 |
| Si | Si | 0.1046605341930160 | 0.2590704696832589 | 0.5227143422046652 |
| Si | Si | 0.6390020289471181 | 0.1848583414571436 | 0.3746501051809901 |
| Al | Al | 0.0859987059510772 | 0.4893586648114407 | 0.4721257108871058 |
| Al | Al | 0.5178107091380468 | 0.8764980481120119 | 0.2765609884557776 |
| Al | Al | 0.5090564955545389 | 0.8885056114478900 | 0.7802207179466691 |
| Al | Al | 0.4971144628175068 | 0.1260595872118273 | 0.5220476322716436 |
| Cu | Cu | 0.2707718822850837 | 0.5645548058743133 | 0.4119554996013596 |
| Cu | Cu | 0.4603911027500625 | 0.7028889632914472 | 0.4226441105689531 |
| Cu | Cu | 0.3982092940335658 | 0.6576446398702416 | 0.2613473888202327 |
| C  | C  | 0.5681700845185261 | 0.4825990765712377 | 0.3287797914538584 |
| H  | H  | 0.5845675416452399 | 0.2169630829156980 | 0.6409479269393148 |
| H  | H  | 0.6000442544635073 | 0.7861965831228394 | 0.6915790399169420 |
| H  | H  | 0.5022772528959459 | 0.4325075578308845 | 0.3110916310905694 |
| H  | H  | 0.6266256597936130 | 0.4915242826912357 | 0.2784437116844901 |
| H  | H  | 0.5407609887280022 | 0.5723192211134731 | 0.3271481124687001 |
| H  | H  | 0.5941367507508062 | 0.4763352359127870 | 0.3972080344466012 |

C. O(1) Final geometry ([Cu<sub>3</sub>(μ-OH)(μ-O)<sub>2</sub>]-MOR + CH<sub>3</sub>)

```

data_CONTCAR\9
_cell_length_a 13.647600
_cell_length_b 13.647600
_cell_length_c 15.015100
_cell_angle_alpha 90.000000
_cell_angle_beta 90.000000
_cell_angle_gamma 97.178902
loop_
_symmetry_equiv_pos_as_xyz
+x,+y,+z

```



| loop_ | _atom_site_type_symbol | _atom_site_label   | _atom_site_fract_x | _atom_site_fract_y | _atom_site_fract_z |
|-------|------------------------|--------------------|--------------------|--------------------|--------------------|
| O     | O                      | 0.1876873189045911 | 0.0311490375411709 | 0.2266467513137828 |                    |
| O     | O                      | 0.2135503104329167 | 0.9961169610792153 | 0.7273868898540096 |                    |
| O     | O                      | 0.4269900682247448 | 0.7954159144211658 | 0.2157287022017597 |                    |
| O     | O                      | 0.4227012590961450 | 0.8072062664215777 | 0.7268888872873411 |                    |
| O     | O                      | 0.6356665626404925 | 0.8898832071943853 | 0.5124050505822898 |                    |
| O     | O                      | 0.6029488322911750 | 0.8608112920709234 | 0.0492937633055391 |                    |
| O     | O                      | 0.8042686540763352 | 0.0072036620792731 | 0.4722065965888969 |                    |
| O     | O                      | 0.7507808853058907 | 0.9784769327971057 | 0.9781452916343496 |                    |
| O     | O                      | 0.6037661084060967 | 0.1862113188065440 | 0.4767200740168290 |                    |
| O     | O                      | 0.5931081702671772 | 0.1987290826453316 | 0.9826554960757289 |                    |
| O     | O                      | 0.3688557368940943 | 0.1214906826156191 | 0.2467745507047359 |                    |
| O     | O                      | 0.3696591636431142 | 0.1313842510153844 | 0.7380230347721630 |                    |
| O     | O                      | 0.9439578410780601 | 0.8028711410929633 | 0.0462847197384941 |                    |
| O     | O                      | 0.9646975449353508 | 0.7555544570819268 | 0.5508525549068845 |                    |
| O     | O                      | 0.1834591316129519 | 0.5718566561799144 | 0.0202345866275753 |                    |
| O     | O                      | 0.1854391126048914 | 0.5730133871714450 | 0.5195291691611356 |                    |
| O     | O                      | 0.1713685747125412 | 0.3955616136018055 | 0.2268609070012949 |                    |
| O     | O                      | 0.1337945649357274 | 0.3600477567736571 | 0.7508068543613233 |                    |
| O     | O                      | 0.0352606985871910 | 0.2484771070796922 | 0.2833404787459410 |                    |
| O     | O                      | 0.0051115053445564 | 0.2011930368333691 | 0.7847136369804729 |                    |
| O     | O                      | 0.8145480368327074 | 0.4359511336626524 | 0.2867710192363931 |                    |
| O     | O                      | 0.8300942283098743 | 0.4228138263126418 | 0.7802675146488283 |                    |
| O     | O                      | 0.8518468287018676 | 0.6243722907328616 | 0.0067758068780650 |                    |
| O     | O                      | 0.8186443217385251 | 0.6245874310827206 | 0.4905551976998371 |                    |
| O     | O                      | 0.8063427085633788 | 0.9481276373857844 | 0.3036983055050654 |                    |
| O     | O                      | 0.7720440342212377 | 0.9548909311813082 | 0.8047799287954652 |                    |
| O     | O                      | 0.5457675719426769 | 0.1801528882707501 | 0.3078484330050855 |                    |
| O     | O                      | 0.5426490752261819 | 0.1950346406300312 | 0.8107313164421334 |                    |
| O     | O                      | 0.4000875487119722 | 0.1627442674560736 | 0.9946737543239063 |                    |
| O     | O                      | 0.3866877244945631 | 0.1677004472320905 | 0.5009136494159800 |                    |
| O     | O                      | 0.2443811406013230 | 0.0469395281037022 | 0.0554945559299506 |                    |
| O     | O                      | 0.2282388250365585 | 0.0442422755777853 | 0.5554887156278154 |                    |
| O     | O                      | 0.4112307721118758 | 0.8403593343920154 | 0.0386605815788293 |                    |
| O     | O                      | 0.4572192018765418 | 0.8061833491536519 | 0.5530243746174236 |                    |
| O     | O                      | 0.6338631682300739 | 0.8466531295790225 | 0.2568386669959425 |                    |
| O     | O                      | 0.6233843891427080 | 0.8436377407940769 | 0.7286222497087261 |                    |
| O     | O                      | 0.0273158467599383 | 0.1940324608154381 | 0.4557968191721598 |                    |
| O     | O                      | 0.0359086569403957 | 0.2035535254738232 | 0.9612355193611154 |                    |
| O     | O                      | 0.7874643361043008 | 0.4307363491037923 | 0.4618635526530638 |                    |
| O     | O                      | 0.8083916542353048 | 0.4405736711074715 | 0.9564303377772195 |                    |

|   |   |                    |                    |                    |
|---|---|--------------------|--------------------|--------------------|
| O | O | 0.9019137169300596 | 0.6152329819610561 | 0.2475417631658692 |
| O | O | 0.8791803803592421 | 0.6143128051107426 | 0.7598567300664505 |
| O | O | 0.9956184861231423 | 0.7925564635141991 | 0.2173567484123512 |
| O | O | 0.9890040938372697 | 0.7874851977712513 | 0.7238367586479948 |
| O | O | 0.1546227465620043 | 0.5863097030443155 | 0.1974783196555985 |
| O | O | 0.1962097092756317 | 0.5414145639085768 | 0.6957081945154137 |
| O | O | 0.1027990306000217 | 0.3738940378714781 | 0.5088353836492315 |
| O | O | 0.1305549764277117 | 0.3825176386845980 | 0.9914679841044680 |
| O | O | 0.2816294990815215 | 0.8932532656266474 | 0.1549897817867317 |
| O | O | 0.3000226373907678 | 0.8836595485233439 | 0.6130430965777824 |
| O | O | 0.6938994550003641 | 0.0854424039662416 | 0.3534891879344636 |
| O | O | 0.6964005826852332 | 0.1096334240151506 | 0.8620295494168745 |
| O | O | 0.1027735564056250 | 0.7216490208028953 | 0.0878054654087669 |
| O | O | 0.1163728710751058 | 0.6955152994662457 | 0.6351594104313579 |
| O | O | 0.9061459653721325 | 0.3140343562549979 | 0.3907472584855928 |
| O | O | 0.8911862190555900 | 0.2909466151484810 | 0.8925024830757103 |
| O | O | 0.2464053117000326 | 0.0898413461841613 | 0.3870792048646372 |
| O | O | 0.2625425738520285 | 0.0780309544326700 | 0.8831669535434921 |
| O | O | 0.4920048822309228 | 0.8522066146292581 | 0.3920171505173423 |
| O | O | 0.5197012811957057 | 0.8703826574479449 | 0.8912603477349750 |
| O | O | 0.7729189253914793 | 0.9026777120548223 | 0.1352083347340328 |
| O | O | 0.7773935954626170 | 0.9280812107929038 | 0.6307737507583933 |
| O | O | 0.5176678362868542 | 0.1495344161903273 | 0.1369961333793011 |
| O | O | 0.5289398836530556 | 0.1649559842989737 | 0.6397013795096441 |
| O | O | 0.9307222883004624 | 0.7469589898362035 | 0.3792961739015308 |
| O | O | 0.9060584696896266 | 0.7568889617674142 | 0.8801223614947298 |
| O | O | 0.1397327481151816 | 0.5152152340925421 | 0.3638013351849910 |
| O | O | 0.1248397218516101 | 0.5115589061760146 | 0.8589151779010290 |
| O | O | 0.1040840165098513 | 0.2467711149047518 | 0.1212738465169556 |
| O | O | 0.0713640309102481 | 0.2259049591737348 | 0.6245553247165999 |
| O | O | 0.8640593727831589 | 0.4795018905245310 | 0.1215135963421739 |
| O | O | 0.8431447943871991 | 0.4967373129221551 | 0.6198236474813570 |
| O | O | 0.2228190881659565 | 0.2232899285859704 | 0.2610237829211774 |
| O | O | 0.1948403211612818 | 0.1874113098166752 | 0.7552964976954494 |
| O | O | 0.7599552269021442 | 0.7839617810850962 | 0.9912146424212673 |
| O | O | 0.7986313198138401 | 0.8119533793084639 | 0.4901187999206087 |
| O | O | 0.7992104712515447 | 0.7635395837516085 | 0.2507839248352274 |
| O | O | 0.7933111362189154 | 0.7748101667044840 | 0.7383809559338299 |
| O | O | 0.2287714605955626 | 0.2275601314042721 | 0.9887751935623432 |
| O | O | 0.2146735042220467 | 0.2289598129776509 | 0.5053970705868214 |
| O | O | 0.5086021393799157 | 0.0154544734198037 | 0.0059043368166490 |
| O | O | 0.4869051698620659 | 0.9999273896702335 | 0.5152734005034550 |
| O | O | 0.9954342855391001 | 0.5087995797866579 | 0.9901064338797988 |
| O | O | 0.9718667651047025 | 0.5246329757106624 | 0.4839203301644361 |
| O | O | 0.4995752220825521 | 0.9944052217402402 | 0.2464497447417188 |
| O | O | 0.5104507113346972 | 0.0091419157049270 | 0.7461924203298210 |

|    |    |                    |                    |                    |
|----|----|--------------------|--------------------|--------------------|
| O  | O  | 0.0014640875428017 | 0.4612364306219013 | 0.2438294985892537 |
| O  | O  | 0.0060089028009768 | 0.4883895262560766 | 0.7162416531625081 |
| O  | O  | 0.0986398302177498 | 0.9147748489031642 | 0.1044187377281234 |
| O  | O  | 0.1069777584444651 | 0.8885144238336170 | 0.6075339819816946 |
| O  | O  | 0.2930204511969909 | 0.7020731197540638 | 0.1189086018040167 |
| O  | O  | 0.3093369604795386 | 0.6893042064657664 | 0.6213223076702243 |
| O  | O  | 0.8893718604662104 | 0.1239870034166617 | 0.3436335953233070 |
| O  | O  | 0.8859224116688683 | 0.0938133380671940 | 0.8916408831828575 |
| O  | O  | 0.7140862296682459 | 0.2824892140991720 | 0.3540439391960881 |
| O  | O  | 0.6999631660405460 | 0.3051841140655838 | 0.8633910105137751 |
| O  | O  | 0.3280235009408473 | 0.5494882368772409 | 0.3048045038231656 |
| O  | O  | 0.5205173169940548 | 0.6593597854107721 | 0.3226246957748217 |
| O  | O  | 0.3865287987999941 | 0.5993056270206484 | 0.4665444537768895 |
| Si | Si | 0.5028864534003920 | 0.1297321696041972 | 0.0320109772959466 |
| Si | Si | 0.7221300619601976 | 0.8803686096245895 | 0.0390543893688026 |
| Si | Si | 0.7544361264239283 | 0.9097567663598041 | 0.5244557326639997 |
| Si | Si | 0.2573232204774945 | 0.1161351900702190 | 0.2822536694130211 |
| Si | Si | 0.2583599947645537 | 0.0981620047431759 | 0.7767092970439010 |
| Si | Si | 0.8955764211064785 | 0.4992898605794723 | 0.2248498496619080 |
| Si | Si | 0.8904837646439292 | 0.5062575423051956 | 0.7183145198580724 |
| Si | Si | 0.1329846089259285 | 0.2775711649283507 | 0.2234781132267657 |
| Si | Si | 0.1019280237833070 | 0.2441093805009222 | 0.7274036223869254 |
| Si | Si | 0.1080065566167380 | 0.4923878895149686 | 0.9647472561302475 |
| Si | Si | 0.8786012956280557 | 0.7346729678553321 | 0.4766714094275533 |
| Si | Si | 0.8651918995515606 | 0.7403750275686536 | 0.9813016580177416 |
| Si | Si | 0.5191940847979315 | 0.8953960615649121 | 0.4923542736838685 |
| Si | Si | 0.5113023442682014 | 0.8974443731309570 | 0.9940419512211233 |
| Si | Si | 0.2714830077534029 | 0.1330642666458068 | 0.4873850512913392 |
| Si | Si | 0.2831151799037263 | 0.1284817870310940 | 0.9811147864353379 |
| Si | Si | 0.4843367753532375 | 0.1079068691343470 | 0.2358031037994142 |
| Si | Si | 0.4852868127903786 | 0.1192921214524895 | 0.7400035392503430 |
| Si | Si | 0.7488094586772116 | 0.8652224574410734 | 0.2374935125980169 |
| Si | Si | 0.7485687770580328 | 0.8778559290280402 | 0.7256975440674073 |
| Si | Si | 0.1194753779297827 | 0.4903652219433507 | 0.2578625450082732 |
| Si | Si | 0.1145425099019802 | 0.4744210423376741 | 0.7559649250379226 |
| Si | Si | 0.9061783952022737 | 0.7304379870707027 | 0.2738642549554557 |
| Si | Si | 0.8933227268543927 | 0.7322855630595502 | 0.7754602634805763 |
| Si | Si | 0.8814908216651907 | 0.5138004965325241 | 0.0190027758143138 |
| Si | Si | 0.8582518489365905 | 0.5185520255893286 | 0.5133752210970254 |
| Si | Si | 0.1250575969737638 | 0.2663478318060840 | 0.0162607813101284 |
| Si | Si | 0.2042234159823054 | 0.9724905231841902 | 0.1350156339177086 |
| Si | Si | 0.2131210194386852 | 0.9539866413894351 | 0.6250311803220731 |
| Si | Si | 0.3544906166706362 | 0.8120820888371296 | 0.1310053089776398 |
| Si | Si | 0.3702894333692576 | 0.7980549863211059 | 0.6313395124764725 |
| Si | Si | 0.7981638491244676 | 0.0416677259171863 | 0.3677545759975455 |
| Si | Si | 0.7762985228948692 | 0.0351123910404093 | 0.8857118699301317 |

|    |    |                    |                    |                    |
|----|----|--------------------|--------------------|--------------------|
| Si | Si | 0.6336354472100014 | 0.2011960164525653 | 0.8816175327832231 |
| Si | Si | 0.0350921696588152 | 0.8072521286421106 | 0.1151718688835900 |
| Si | Si | 0.0453417053115687 | 0.7818291902460001 | 0.6282938720049442 |
| Si | Si | 0.1821106989097089 | 0.6448902929998024 | 0.1054987970301166 |
| Si | Si | 0.2022215437184285 | 0.6250757451784535 | 0.6178752951801154 |
| Si | Si | 0.9652928894414382 | 0.2201741528206219 | 0.3687943415791308 |
| Si | Si | 0.9549641929373303 | 0.1986549590814087 | 0.8822311716729700 |
| Si | Si | 0.8058930830828176 | 0.3647934041414916 | 0.3741182973136896 |
| Si | Si | 0.8091628186759872 | 0.3649175321826628 | 0.8734636894644361 |
| Si | Si | 0.1047696156167337 | 0.2583955257190436 | 0.5232036397581519 |
| Si | Si | 0.6395511943504416 | 0.1835730425549835 | 0.3748073591516887 |
| Al | Al | 0.0867865485433557 | 0.4888948413651015 | 0.4722096056501947 |
| Al | Al | 0.5180094402034114 | 0.8770439891633753 | 0.2763716516117986 |
| Al | Al | 0.5091700143722850 | 0.8885078302211714 | 0.7801539160369609 |
| Al | Al | 0.4969893820942945 | 0.1266633371753642 | 0.5222898199167422 |
| Cu | Cu | 0.2717722530395123 | 0.5642114867898360 | 0.4117004584099177 |
| Cu | Cu | 0.4585027588936385 | 0.7085727119525671 | 0.4255495032095605 |
| Cu | Cu | 0.3961149280582941 | 0.6588509503790992 | 0.2614639726136603 |
| C  | C  | 0.5800897080687617 | 0.4620765063856010 | 0.3241479541671556 |
| H  | H  | 0.5844555130581822 | 0.2174211155445377 | 0.6414993471467662 |
| H  | H  | 0.6007204295570121 | 0.7837228012088753 | 0.6948550639326929 |
| H  | H  | 0.5175653938671326 | 0.4083818612540389 | 0.3059285718542409 |
| H  | H  | 0.6309172274595307 | 0.4934122281116871 | 0.2727196141329974 |
| H  | H  | 0.5297621394351941 | 0.5881640876158931 | 0.3319643727185475 |
| H  | H  | 0.6031839914340895 | 0.4685635055940754 | 0.3935904766209659 |

D. O(2) Initial geometry ([Cu<sub>3</sub>(μ-O)<sub>3</sub>]-MOR + CH<sub>4</sub>)

```

data_CONTCAR\9
_cell_length_a 13.647600
_cell_length_b 13.647600
_cell_length_c 15.015100
_cell_angle_alpha 90.000000
_cell_angle_beta 90.000000
_cell_angle_gamma 97.178902
loop_
_symmetry_equiv_pos_as_xyz
+x,+y,+z
loop_
_atom_site_type_symbol
_atom_site_label
_atom_site_fract_x
_atom_site_fract_y
_atom_site_fract_z
O O 0.1835948223647478 0.0321732451754341 0.2258736960450980

```

|   |   |                    |                    |                    |
|---|---|--------------------|--------------------|--------------------|
| O | O | 0.2135528145788554 | 0.9962749823988148 | 0.7275675389385976 |
| O | O | 0.4248923699460340 | 0.7941133340605282 | 0.2167950007954609 |
| O | O | 0.4202350509279242 | 0.8074968187938825 | 0.7278268885494811 |
| O | O | 0.6351244557181434 | 0.8873837384017924 | 0.5119940823872537 |
| O | O | 0.6008330217862949 | 0.8606575392820996 | 0.0512716191026578 |
| O | O | 0.8001508858356021 | 0.0096766237886007 | 0.4729233405836167 |
| O | O | 0.7486706029028726 | 0.9779691692632640 | 0.9782193537945473 |
| O | O | 0.5998412675972463 | 0.1881609651276915 | 0.4774476736211892 |
| O | O | 0.5934521535730596 | 0.1974222797288677 | 0.9837499852547552 |
| O | O | 0.3642628586248063 | 0.1215020169316011 | 0.2445849364581277 |
| O | O | 0.3684033715851481 | 0.1327713664680976 | 0.7394190163725406 |
| O | O | 0.9410459146615351 | 0.8043334700438709 | 0.0475788466649587 |
| O | O | 0.9648244831135069 | 0.7545722289808315 | 0.5516904175893023 |
| O | O | 0.1810569086859773 | 0.5727966202097872 | 0.0197907722420628 |
| O | O | 0.1798766738051539 | 0.5759894606197287 | 0.5197531177960782 |
| O | O | 0.1653133134561103 | 0.3967035999909220 | 0.2295374552051123 |
| O | O | 0.1313253416569349 | 0.3602961151088621 | 0.7513502233365111 |
| O | O | 0.0291325343779143 | 0.2504002987976239 | 0.2823677193716986 |
| O | O | 0.0033987058945474 | 0.2007391529715183 | 0.7843048431137518 |
| O | O | 0.8067601923492930 | 0.4428973312508838 | 0.2880882680513545 |
| O | O | 0.8299959094161199 | 0.4228338748581855 | 0.7812258899503363 |
| O | O | 0.8518602280757837 | 0.6251635191260020 | 0.0062980412079622 |
| O | O | 0.8160773195136040 | 0.6265056370959255 | 0.4922578195152396 |
| O | O | 0.8012518721047506 | 0.9510394694040958 | 0.3045839195090502 |
| O | O | 0.7720834619188103 | 0.9542097500888258 | 0.8052460998853712 |
| O | O | 0.5390756047839055 | 0.1791266444696226 | 0.3093830669835035 |
| O | O | 0.5416397150684377 | 0.1950669872763034 | 0.8120782815482124 |
| O | O | 0.3999742543618087 | 0.1625570110851206 | 0.9938273139730178 |
| O | O | 0.3829959889397615 | 0.1657722670808384 | 0.5026918029680374 |
| O | O | 0.2454895147983687 | 0.0459001031201618 | 0.0558130472739250 |
| O | O | 0.2240853172575656 | 0.0439772702437831 | 0.5552992108503625 |
| O | O | 0.4084543447422457 | 0.8404701695129407 | 0.0410743643490919 |
| O | O | 0.4571816017802946 | 0.8061132334678145 | 0.5544912800996429 |
| O | O | 0.6312067879589377 | 0.8449566491118122 | 0.2570760615304136 |
| O | O | 0.6212232420919505 | 0.8442325313266327 | 0.7302536984195623 |
| O | O | 0.0208963851003203 | 0.1993626288215920 | 0.4556796906142770 |
| O | O | 0.0359934505284793 | 0.2038184872362146 | 0.9606083556226940 |
| O | O | 0.7808619692744535 | 0.4324532357821894 | 0.4634127014645859 |
| O | O | 0.8068377253443910 | 0.4410979074026264 | 0.9566380639929964 |
| O | O | 0.9005006785126289 | 0.6190572085517585 | 0.2444150584619368 |
| O | O | 0.8792092950251729 | 0.6147128334822241 | 0.7615773749734983 |
| O | O | 0.9948803907681812 | 0.7963444744280860 | 0.2185782341644472 |
| O | O | 0.9862127772428558 | 0.7893337765837899 | 0.7247929109414989 |
| O | O | 0.1477360291589323 | 0.5857691650107701 | 0.1966348807081395 |
| O | O | 0.1949942883549413 | 0.5408701123848149 | 0.6951384773832849 |
| O | O | 0.1027731301054703 | 0.3760728860518275 | 0.5091735967804283 |

|   |   |                    |                     |                    |
|---|---|--------------------|---------------------|--------------------|
| O | O | 0.1311080639479549 | 0.3829500999222561  | 0.9896657605784415 |
| O | O | 0.2786133116921058 | 0.8926467021241641  | 0.1578757183834727 |
| O | O | 0.2994576047285568 | 0.8845616230068707  | 0.6121208597153787 |
| O | O | 0.6908494446041642 | 0.0898747557905035  | 0.3537794755739455 |
| O | O | 0.6956902559087695 | 0.1090333746935333  | 0.8616548294431727 |
| O | O | 0.0992901417054639 | 0.7222942569667531  | 0.0879274239172594 |
| O | O | 0.1148845873696902 | 0.6963470600360486  | 0.6394773737297105 |
| O | O | 0.8977742341034991 | 0.3168224699240613  | 0.3881358341619912 |
| O | O | 0.8904166484657825 | 0.2909211143363766  | 0.8933144826411997 |
| O | O | 0.2448470582396794 | 0.0880642520409185  | 0.3865356077103111 |
| O | O | 0.2603454894884395 | 0.0783829151386094  | 0.8835619097813384 |
| O | O | 0.4902782179789998 | 0.8532825240313473  | 0.3930113535036578 |
| O | O | 0.5163326183073453 | 0.8686541558152969  | 0.8936630409447932 |
| O | O | 0.7704676086005060 | 0.9044249627376656  | 0.1361636390923757 |
| O | O | 0.7752811337112574 | 0.9274502227009649  | 0.6312624533119442 |
| O | O | 0.5157389087123556 | 0.1493719197724233  | 0.1377972210029138 |
| O | O | 0.5273906098766514 | 0.1637526280791633  | 0.6411877753871619 |
| O | O | 0.9310536961926764 | 0.7458388112718979  | 0.3799456314146252 |
| O | O | 0.9033803075738563 | 0.7589372219219146  | 0.8807256534141206 |
| O | O | 0.1329194358357786 | 0.5183670823288715  | 0.3643586084383957 |
| O | O | 0.1214685034695873 | 0.5127598073561852  | 0.8582189531764843 |
| O | O | 0.1020345500525054 | 0.2491666410381212  | 0.1211765823787490 |
| O | O | 0.0700343972486084 | 0.2270303919758951  | 0.6240641985928029 |
| O | O | 0.8603713933039879 | 0.4802702487322695  | 0.1216263301611732 |
| O | O | 0.8383423601532660 | 0.4977786157788539  | 0.6215965690343673 |
| O | O | 0.2169492398021717 | 0.2234992738024717  | 0.2632309981635548 |
| O | O | 0.1931141484313410 | 0.1874585059968775  | 0.7548806879062191 |
| O | O | 0.7573870833893024 | 0.7836048992127942  | 0.9929516118560037 |
| O | O | 0.8011752350821526 | 0.8150045414952740  | 0.4892904340551512 |
| O | O | 0.7986293901193480 | 0.7670755794438489  | 0.2529982135319050 |
| O | O | 0.7904352403670248 | 0.7735234608179575  | 0.7385485541634620 |
| O | O | 0.2282995065500585 | 0.2270840242223270  | 0.9907556389877633 |
| O | O | 0.2101158151448004 | 0.2276600839039752  | 0.5025077701323891 |
| O | O | 0.5070852913643047 | 0.0149729034238420  | 0.0072712962468540 |
| O | O | 0.4875559349011812 | -0.0000980070085846 | 0.5171951480717013 |
| O | O | 0.9938512847604603 | 0.5071090638315742  | 0.9914030950223310 |
| O | O | 0.9662205059984005 | 0.5231744299988857  | 0.4858355836768031 |
| O | O | 0.4956810907786509 | 0.9937813473134731  | 0.2464477657319057 |
| O | O | 0.5074684099983446 | 0.0087231096255533  | 0.7492873383379880 |
| O | O | 0.9941731329503530 | 0.4616360416708832  | 0.2462090250634873 |
| O | O | 0.0044179240245111 | 0.4889499205159892  | 0.7140031399058826 |
| O | O | 0.0971945253034867 | 0.9156425422236752  | 0.1029370469297626 |
| O | O | 0.1058664653544359 | 0.8885352225922643  | 0.6088616263435925 |
| O | O | 0.2889874158826575 | 0.7018460949119104  | 0.1199352652880158 |
| O | O | 0.3073226124311653 | 0.6900653604015540  | 0.6213540896476875 |
| O | O | 0.8857585140599079 | 0.1260079787628929  | 0.3437661048772071 |

|    |    |                    |                    |                    |
|----|----|--------------------|--------------------|--------------------|
| O  | O  | 0.8851048040958117 | 0.0937358618608273 | 0.8926067012391843 |
| O  | O  | 0.7050349031171868 | 0.2877198118891048 | 0.3527953446776610 |
| O  | O  | 0.6992754281293666 | 0.3045952294731780 | 0.8641779133296877 |
| O  | O  | 0.3186065728454303 | 0.5589836465365714 | 0.3040572850068359 |
| O  | O  | 0.5207804603668166 | 0.6590096030416948 | 0.3272505980325406 |
| O  | O  | 0.3760784476328118 | 0.6091655892347289 | 0.4669665111864627 |
| Si | Si | 0.5022414781828498 | 0.1295496931056223 | 0.0327262306800666 |
| Si | Si | 0.7199523460942077 | 0.8805834134291186 | 0.0400344209748484 |
| Si | Si | 0.7537433087667640 | 0.9103268769519184 | 0.5245311837385234 |
| Si | Si | 0.2534757304169824 | 0.1165622174395137 | 0.2820631361787057 |
| Si | Si | 0.2569723579402344 | 0.0986084781968085 | 0.7770808548541366 |
| Si | Si | 0.8895711390339835 | 0.5022070252270661 | 0.2251029712385020 |
| Si | Si | 0.8888854429371719 | 0.5068052744735323 | 0.7188113275059285 |
| Si | Si | 0.1281660992410776 | 0.2786558006401224 | 0.2241731434234951 |
| Si | Si | 0.1002425354683704 | 0.2443004099578170 | 0.7271218123401918 |
| Si | Si | 0.1064665469705149 | 0.4926426101479685 | 0.9642392233361402 |
| Si | Si | 0.8786695129385069 | 0.7350615932440241 | 0.4773022331769094 |
| Si | Si | 0.8631630075907010 | 0.7413238255136417 | 0.9820230196592170 |
| Si | Si | 0.5188814971783560 | 0.8951878338295995 | 0.4938231185788962 |
| Si | Si | 0.5087305589818345 | 0.8968414075306217 | 0.9963780813771721 |
| Si | Si | 0.2679733391434939 | 0.1319676652555317 | 0.4868295937926604 |
| Si | Si | 0.2828078602178347 | 0.1282154693309832 | 0.9815022854544070 |
| Si | Si | 0.4799034530932855 | 0.1073302357234769 | 0.2358496309930531 |
| Si | Si | 0.4836481993391923 | 0.1191706334206468 | 0.7418841009940782 |
| Si | Si | 0.7464401358165983 | 0.8670834863084677 | 0.2384087112365851 |
| Si | Si | 0.7466932124998591 | 0.8772362561777004 | 0.7263459212115745 |
| Si | Si | 0.1120992961097290 | 0.4912930780256714 | 0.2583960002895216 |
| Si | Si | 0.1123260720428846 | 0.4749474456156663 | 0.7553539839281973 |
| Si | Si | 0.9054184763315989 | 0.7332265996040551 | 0.2743910959128845 |
| Si | Si | 0.8911659911145869 | 0.7327854047123201 | 0.7762624691898291 |
| Si | Si | 0.8799567403655060 | 0.5142183402988852 | 0.0192655293319440 |
| Si | Si | 0.8526164399069633 | 0.5190660760716670 | 0.5150627491583588 |
| Si | Si | 0.1245083511383646 | 0.2670052448309641 | 0.0161129634101534 |
| Si | Si | 0.2023720636217992 | 0.9725884375401964 | 0.1352200774741329 |
| Si | Si | 0.2120749697704535 | 0.9542055190143375 | 0.6252065709489333 |
| Si | Si | 0.3508430340460114 | 0.8111503525290110 | 0.1327562007473265 |
| Si | Si | 0.3692008529455566 | 0.7986574291011148 | 0.6316402869639262 |
| Si | Si | 0.7942873139239225 | 0.0447470829852598 | 0.3684823747116965 |
| Si | Si | 0.7756004946652547 | 0.0346636156095546 | 0.8859697977398826 |
| Si | Si | 0.6330872287855056 | 0.2004785600513654 | 0.8823677027075428 |
| Si | Si | 0.0329383574122835 | 0.8088449339388082 | 0.1158204142398030 |
| Si | Si | 0.0438203353494433 | 0.7824369161211543 | 0.6302487722598347 |
| Si | Si | 0.1781985842163464 | 0.6450130914092030 | 0.1055248327167413 |
| Si | Si | 0.1999768107809813 | 0.6261662815871513 | 0.6189260397840377 |
| Si | Si | 0.9590785448928600 | 0.2242024035752285 | 0.3680813721604534 |
| Si | Si | 0.9541876947205458 | 0.1986522659354383 | 0.8822625718320378 |

|    |    |                    |                    |                    |
|----|----|--------------------|--------------------|--------------------|
| Si | Si | 0.7976059678318541 | 0.3691362558447675 | 0.3737272021776852 |
| Si | Si | 0.8081829072387484 | 0.3648448121834485 | 0.8743230381394164 |
| Si | Si | 0.1016626103124135 | 0.2598411263358897 | 0.5223293419245347 |
| Si | Si | 0.6341397831071206 | 0.1866078378759378 | 0.3750188742317633 |
| Al | Al | 0.0815667497281051 | 0.4898566451531857 | 0.4734211213113918 |
| Al | Al | 0.5162855446855280 | 0.8771989649666090 | 0.2766656976250403 |
| Al | Al | 0.5062627661703505 | 0.8879911808176736 | 0.7827619205827089 |
| Al | Al | 0.4943439168945732 | 0.1265021368268566 | 0.5235765330429087 |
| Cu | Cu | 0.2626116057350201 | 0.5699670819878038 | 0.4116140025701360 |
| Cu | Cu | 0.4606263225356111 | 0.7083649681787134 | 0.4234740463623345 |
| Cu | Cu | 0.4062158854298738 | 0.6573356818828827 | 0.2639589557874757 |
| C  | C  | 0.4022451137570576 | 0.4059744672883770 | 0.1548411053012955 |
| H  | H  | 0.5819526150824363 | 0.2172584898516133 | 0.6425979760336912 |
| H  | H  | 0.5982296934769332 | 0.7846238087220234 | 0.6961466010205001 |
| H  | H  | 0.3428090683916282 | 0.3591809564626726 | 0.1204619507244591 |
| H  | H  | 0.4428671372260920 | 0.4556960787577656 | 0.1063379592670483 |
| H  | H  | 0.3696431159659989 | 0.4483295637327140 | 0.2067973447035415 |
| H  | H  | 0.4525147696154225 | 0.3594324455546754 | 0.1860172485942388 |

E. O(2) Transition state ([Cu<sub>3</sub>(μ-O)<sub>3</sub>]-MOR•••CH4)

data\_OSiAlCuCH

\_cell\_length\_a 13.647600

\_cell\_length\_b 13.647600

\_cell\_length\_c 15.015100

\_cell\_angle\_alpha 90.000000

\_cell\_angle\_beta 90.000000

\_cell\_angle\_gamma 97.178902

loop\_

\_symmetry\_equiv\_pos\_as\_xyz

+x,+y,+z

loop\_

\_atom\_site\_type\_symbol

\_atom\_site\_label

\_atom\_site\_fract\_x

\_atom\_site\_fract\_y

\_atom\_site\_fract\_z

|   |   |                    |                    |                    |
|---|---|--------------------|--------------------|--------------------|
| O | O | 0.1840365805690070 | 0.0307780494399879 | 0.2251683761940484 |
| O | O | 0.2133866376094886 | 0.9959478327747959 | 0.7276705627475764 |
| O | O | 0.4230996933928779 | 0.7948957961776841 | 0.2133637137355890 |
| O | O | 0.4234736484300115 | 0.8071688795941014 | 0.7255250943306919 |
| O | O | 0.6340829267943136 | 0.8861425319718350 | 0.5142229940100620 |
| O | O | 0.6001905645309265 | 0.8620320207682184 | 0.0520051170926052 |
| O | O | 0.7984368356302056 | 0.0090545850307322 | 0.4726826685381766 |
| O | O | 0.7477044088544460 | 0.9783360976599695 | 0.9778516215193420 |



|   |   |                    |                    |                    |
|---|---|--------------------|--------------------|--------------------|
| O | O | 0.5996002295267715 | 0.1867622217295661 | 0.4768637887146667 |
| O | O | 0.5934014119816311 | 0.1966316315837418 | 0.9833485506420345 |
| O | O | 0.3651914291739899 | 0.1197341987725480 | 0.2441006502367244 |
| O | O | 0.3683771202912212 | 0.1321134145204752 | 0.7379073715187019 |
| O | O | 0.9405298012224748 | 0.8023149810493493 | 0.0476463933370042 |
| O | O | 0.9650792820256555 | 0.7550276704858803 | 0.5513078561773597 |
| O | O | 0.1800880709577939 | 0.5720772074427813 | 0.0196124833496540 |
| O | O | 0.1805720844960774 | 0.5778926241408797 | 0.5196963947843969 |
| O | O | 0.1640955055686888 | 0.3935786044073737 | 0.2220424965195633 |
| O | O | 0.1329623100735091 | 0.3600860224108331 | 0.7520476834608232 |
| O | O | 0.0296468869606699 | 0.2489857186767992 | 0.2819859394023183 |
| O | O | 0.0035415424703729 | 0.2005929633780283 | 0.7831193011396067 |
| O | O | 0.8071085815296399 | 0.4427625587158133 | 0.2878906082959887 |
| O | O | 0.8292784133989883 | 0.4227989552505420 | 0.7804379711098264 |
| O | O | 0.8490970808647162 | 0.6242043646988051 | 0.0057556771546174 |
| O | O | 0.8181721018826735 | 0.6258243398387080 | 0.4912070944507576 |
| O | O | 0.8018274959592588 | 0.9503999243857209 | 0.3046091981300165 |
| O | O | 0.7716417216898250 | 0.9534577889876701 | 0.8049959285752166 |
| O | O | 0.5395343130403489 | 0.1778526415933044 | 0.3080971842073907 |
| O | O | 0.5408230515088661 | 0.1948511423370647 | 0.8119464150685829 |
| O | O | 0.3998627489052922 | 0.1638324734050300 | 0.9951306582383239 |
| O | O | 0.3833253648246000 | 0.1652260140004813 | 0.5012630996476162 |
| O | O | 0.2439524604242180 | 0.0473314531853504 | 0.0548453134343916 |
| O | O | 0.2249306188408653 | 0.0437619408618204 | 0.5552580620459011 |
| O | O | 0.4071657969824827 | 0.8387585099736441 | 0.0375032186399338 |
| O | O | 0.4534574681682457 | 0.8025521101995992 | 0.5502436832988238 |
| O | O | 0.6323787707655342 | 0.8446171948617547 | 0.2561238951128217 |
| O | O | 0.6218895897092835 | 0.8438927275530688 | 0.7291931899845281 |
| O | O | 0.0218952443679470 | 0.2001784507183757 | 0.4555817303457488 |
| O | O | 0.0363509529850887 | 0.2023190294234496 | 0.9588693550127800 |
| O | O | 0.7827737496736091 | 0.4321744548437252 | 0.4633610415310159 |
| O | O | 0.8060506389143853 | 0.4395477558670535 | 0.9565011062535334 |
| O | O | 0.9022094537104692 | 0.6187865508864547 | 0.2441710452826484 |
| O | O | 0.8800666175030756 | 0.6142285620292327 | 0.7608840111851336 |
| O | O | 0.9961231236644750 | 0.7963888329589253 | 0.2184365023347610 |
| O | O | 0.9853496430026851 | 0.7901770687309764 | 0.7245102463331747 |
| O | O | 0.1485235985548599 | 0.5847661788724423 | 0.1963083775300163 |
| O | O | 0.1952745530662412 | 0.5416042764695490 | 0.6960279196046386 |
| O | O | 0.1045720135756909 | 0.3776195149312755 | 0.5072896750137019 |
| O | O | 0.1287340429006179 | 0.3822703503616154 | 0.9919244920988177 |
| O | O | 0.2764990418997826 | 0.8919037120562550 | 0.1534876833629042 |
| O | O | 0.2997518050257071 | 0.8842427307923515 | 0.6129209035341248 |
| O | O | 0.6920508906367289 | 0.0908726405635534 | 0.3527211015507774 |
| O | O | 0.6954055984509040 | 0.1089355449864584 | 0.8606612996936889 |
| O | O | 0.1006735489608701 | 0.7234072094611079 | 0.0878483390135401 |
| O | O | 0.1150317147923872 | 0.6971929014137075 | 0.6414063269662833 |

|    |    |                    |                    |                    |
|----|----|--------------------|--------------------|--------------------|
| O  | O  | 0.8970013927009575 | 0.3150633599908375 | 0.3865014894037913 |
| O  | O  | 0.8903374877591901 | 0.2901489544918121 | 0.8922693887422142 |
| O  | O  | 0.2446343206340558 | 0.0876660528393600 | 0.3859638311292173 |
| O  | O  | 0.2618179504875400 | 0.0792314280931876 | 0.8829910155871445 |
| O  | O  | 0.4893108660874290 | 0.8538643673397104 | 0.3939145583064843 |
| O  | O  | 0.5185422452508774 | 0.8665235399264120 | 0.8930164775700149 |
| O  | O  | 0.7713386016455388 | 0.9053272735083766 | 0.1357606267692120 |
| O  | O  | 0.7764598942282106 | 0.9268257238358331 | 0.6309633707783320 |
| O  | O  | 0.5165315042303860 | 0.1453400077809874 | 0.1373893647910478 |
| O  | O  | 0.5277535922483594 | 0.1634005586116984 | 0.6409917726687553 |
| O  | O  | 0.9311994407987072 | 0.7467102513979498 | 0.3794260461639283 |
| O  | O  | 0.9025788363318412 | 0.7580346052124298 | 0.8806830349189099 |
| O  | O  | 0.1415652750588379 | 0.5123614922444872 | 0.3607680383606890 |
| O  | O  | 0.1211812379228903 | 0.5113021642940367 | 0.8588733664483641 |
| O  | O  | 0.1005653010761094 | 0.2429489201253574 | 0.1196942583418377 |
| O  | O  | 0.0712760759760229 | 0.2290554171826713 | 0.6232323163641453 |
| O  | O  | 0.8596532448908931 | 0.4799583729658394 | 0.1218341954220818 |
| O  | O  | 0.8429069780786520 | 0.4978020139939687 | 0.6197019319149391 |
| O  | O  | 0.2179381698982894 | 0.2222059980586053 | 0.2609878393208476 |
| O  | O  | 0.1932232845026931 | 0.1871196963739337 | 0.7542182712002585 |
| O  | O  | 0.7566709607807383 | 0.7841818149006201 | 0.9930613848502290 |
| O  | O  | 0.8004015562288487 | 0.8142356048174690 | 0.4888489184786522 |
| O  | O  | 0.7998726120118533 | 0.7667085952226742 | 0.2510871649890873 |
| O  | O  | 0.7900080444396380 | 0.7725094188051216 | 0.7385142004580274 |
| O  | O  | 0.2287148845281024 | 0.2286009513466922 | 0.9894167569466461 |
| O  | O  | 0.2108854965253286 | 0.2277827888205266 | 0.5017319426665807 |
| O  | O  | 0.5044499706784364 | 0.0141820785009799 | 0.0041722084432365 |
| O  | O  | 0.4871410162466248 | 0.9989224201166991 | 0.5203229818652062 |
| O  | O  | 0.9923957138720212 | 0.5075018701476210 | 0.9914050652392064 |
| O  | O  | 0.9691625027077038 | 0.5226587180147533 | 0.4803031991390228 |
| O  | O  | 0.4957959749534027 | 0.9901847392730616 | 0.2482906899401200 |
| O  | O  | 0.5077246460724609 | 0.0083576796386069 | 0.7500353600596199 |
| O  | O  | 0.9949514693103296 | 0.4609141832461532 | 0.2459219054413495 |
| O  | O  | 0.0049253598564221 | 0.4871655680837819 | 0.7149266024864644 |
| O  | O  | 0.0952637757050212 | 0.9165986331156546 | 0.1012746323184359 |
| O  | O  | 0.1058290187576389 | 0.8887253482903574 | 0.6085894107359309 |
| O  | O  | 0.2894061724051227 | 0.7000707843750504 | 0.1199773935072628 |
| O  | O  | 0.3070777409868271 | 0.6891915163985374 | 0.6217483742974252 |
| O  | O  | 0.8872794136202558 | 0.1242608044381583 | 0.3442438826818091 |
| O  | O  | 0.8847659699942767 | 0.0930336523577395 | 0.8915287633463436 |
| O  | O  | 0.7036516263571784 | 0.2887704669996793 | 0.3530439612079590 |
| O  | O  | 0.6989346251997404 | 0.3043218056195656 | 0.8634587242226814 |
| O  | O  | 0.3367243095831676 | 0.5361648899998005 | 0.2887659057649531 |
| O  | O  | 0.5156722749684955 | 0.6670972352192974 | 0.3186318849675635 |
| O  | O  | 0.3874615972231175 | 0.5968368375061681 | 0.4651974343967906 |
| Si | Si | 0.5021333242156842 | 0.1285149362781155 | 0.0320273872618131 |

|    |    |                    |                    |                    |
|----|----|--------------------|--------------------|--------------------|
| Si | Si | 0.7194587565903134 | 0.8813167657194754 | 0.0403594134061862 |
| Si | Si | 0.7532099342222409 | 0.9095984547742262 | 0.5244660180235385 |
| Si | Si | 0.2542419504746931 | 0.1149369634789679 | 0.2813441510597841 |
| Si | Si | 0.2571685151344596 | 0.0985777351726398 | 0.7763905556511830 |
| Si | Si | 0.8903405008017558 | 0.5017602134302805 | 0.2251881448748918 |
| Si | Si | 0.8898937118845893 | 0.5061613488877512 | 0.7181939445612571 |
| Si | Si | 0.1272468395149176 | 0.2751677752305284 | 0.2219619946219566 |
| Si | Si | 0.1008423518435890 | 0.2447551063039910 | 0.7265114943411248 |
| Si | Si | 0.1048139965635357 | 0.4918303184263948 | 0.9645238349987508 |
| Si | Si | 0.8789411216860472 | 0.7351139948227825 | 0.4768849755066995 |
| Si | Si | 0.8618927491971817 | 0.7407168014562018 | 0.9818599015915481 |
| Si | Si | 0.5185257963685572 | 0.8950316225867638 | 0.4943560544915115 |
| Si | Si | 0.5084531539527433 | 0.8961864491090950 | 0.9951266348981989 |
| Si | Si | 0.2680097972748641 | 0.1316445246970233 | 0.4863767083551096 |
| Si | Si | 0.2828633477375107 | 0.1292420158320198 | 0.9809099410827358 |
| Si | Si | 0.4808038551853997 | 0.1036234507974285 | 0.2357811493814239 |
| Si | Si | 0.4835445595258818 | 0.1186112801637123 | 0.7415076803024405 |
| Si | Si | 0.7474006798586714 | 0.8667903197715034 | 0.2378037558678443 |
| Si | Si | 0.7471957458382903 | 0.8765861941606587 | 0.7258907751968664 |
| Si | Si | 0.1134972987505094 | 0.4882768829083517 | 0.2563039978485051 |
| Si | Si | 0.1133162490580446 | 0.4746168105903124 | 0.7555069970954449 |
| Si | Si | 0.9063829575871054 | 0.7330428036853434 | 0.2738908877347654 |
| Si | Si | 0.8910718549241210 | 0.7322458032276415 | 0.7760054077080838 |
| Si | Si | 0.8779943940821795 | 0.5135331437059349 | 0.0192808216448981 |
| Si | Si | 0.8567404178272255 | 0.5189788961785808 | 0.5129272254763748 |
| Si | Si | 0.1235301029378419 | 0.2656949848243855 | 0.0152935779973902 |
| Si | Si | 0.2008068525330131 | 0.9728405520622161 | 0.1331497974471745 |
| Si | Si | 0.2121021002117871 | 0.9539082244963524 | 0.6252706962142796 |
| Si | Si | 0.3497872341189350 | 0.8114548735111171 | 0.1296756840707758 |
| Si | Si | 0.3686442723005072 | 0.7973022548424140 | 0.6312618492017137 |
| Si | Si | 0.7944533872449071 | 0.0443760619019216 | 0.3681849149160072 |
| Si | Si | 0.7749881066336002 | 0.0342716708369082 | 0.8852820830387174 |
| Si | Si | 0.6327638016837369 | 0.2003112228895958 | 0.8816871578199965 |
| Si | Si | 0.0328398123837133 | 0.8090054238935735 | 0.1154790290940682 |
| Si | Si | 0.0437814653352859 | 0.7824994612199561 | 0.6303053557279839 |
| Si | Si | 0.1774246320653958 | 0.6442924639438772 | 0.1052674848812387 |
| Si | Si | 0.1988863621953740 | 0.6258098787654021 | 0.6181754074580894 |
| Si | Si | 0.9595456871973127 | 0.2232956852145449 | 0.3680142277968770 |
| Si | Si | 0.9542138210982287 | 0.1977336405031878 | 0.8811545613427114 |
| Si | Si | 0.7977059639002277 | 0.3688777939036498 | 0.3735440539304662 |
| Si | Si | 0.8081207709526907 | 0.3642747547432421 | 0.8734034148995633 |
| Si | Si | 0.1029673379309912 | 0.2619130058475321 | 0.5213869408534819 |
| Si | Si | 0.6341194622726221 | 0.1865622753121201 | 0.3745312096109856 |
| Al | Al | 0.0873014649855790 | 0.4929931191496664 | 0.4707208693939506 |
| Al | Al | 0.5156515316117236 | 0.8712747326200585 | 0.2768835871358561 |
| Al | Al | 0.5078432502477312 | 0.8873486984951739 | 0.7825297398974698 |

|    |    |                    |                    |                    |
|----|----|--------------------|--------------------|--------------------|
| Al | Al | 0.4942540999063780 | 0.1260221453092782 | 0.5236604112269561 |
| Cu | Cu | 0.2764449824745184 | 0.5570306059251534 | 0.4043115214945632 |
| Cu | Cu | 0.4597359284837614 | 0.7036255914366532 | 0.4213294987428318 |
| Cu | Cu | 0.4013330353187967 | 0.6565583430084471 | 0.2512396144095604 |
| C  | C  | 0.4014317707642346 | 0.4211995694692819 | 0.1757911390359785 |
| H  | H  | 0.5828846053450523 | 0.2162822568613492 | 0.6425394428197770 |
| H  | H  | 0.5979419543458020 | 0.7860507526219870 | 0.6930857185870142 |
| H  | H  | 0.3331410744049262 | 0.3814374027350596 | 0.1497881149132213 |
| H  | H  | 0.4402615849275487 | 0.4759413087003515 | 0.1309432865305226 |
| H  | H  | 0.3635767176744307 | 0.4755050931587856 | 0.2467647916677810 |
| H  | H  | 0.4482006599232594 | 0.3782249533876033 | 0.2152587190430086 |

F. O(2) Final geometry ([Cu<sub>3</sub>( $\mu$ -OH)( $\mu$ -O)<sub>2</sub>]-MOR + CH<sub>3</sub>)

data\_POSCAR

\_cell\_length\_a 13.647600  
 \_cell\_length\_b 13.647600  
 \_cell\_length\_c 15.015100  
 \_cell\_angle\_alpha 90.000000  
 \_cell\_angle\_beta 90.000000  
 \_cell\_angle\_gamma 97.178902

loop\_

\_symmetry\_equiv\_pos\_as\_xyz

+x,+y,+z

loop\_

\_atom\_site\_type\_symbol

\_atom\_site\_label

\_atom\_site\_fract\_x

\_atom\_site\_fract\_y

\_atom\_site\_fract\_z

|   |   |                    |                    |                    |
|---|---|--------------------|--------------------|--------------------|
| O | O | 0.1844586317926865 | 0.0303692357813476 | 0.2247052211496731 |
| O | O | 0.2130038241754736 | 0.9968437374771453 | 0.7270956320261144 |
| O | O | 0.4247782224630292 | 0.7976679721402986 | 0.2119498693267245 |
| O | O | 0.4246426173154884 | 0.8073332012169006 | 0.7246382630822216 |
| O | O | 0.6338187560060632 | 0.8855827374317340 | 0.5153479634146459 |
| O | O | 0.5996805386681083 | 0.8606342279001270 | 0.0499215908065747 |
| O | O | 0.7975094576786065 | 0.0086706777405424 | 0.4721855859999929 |
| O | O | 0.7477352761341318 | 0.9776096003987560 | 0.9773160542530828 |
| O | O | 0.6001637732893806 | 0.1862663590042329 | 0.4762990535001962 |
| O | O | 0.5936104278545604 | 0.1952290694904364 | 0.9834747685198819 |
| O | O | 0.3652859551443139 | 0.1193421033066016 | 0.2440877292421198 |
| O | O | 0.3692161389621364 | 0.1315070192310335 | 0.7373749453904191 |
| O | O | 0.9407289173042853 | 0.8009375072194894 | 0.0484137322443614 |
| O | O | 0.9640331026920794 | 0.7551633217442726 | 0.5521086498801968 |
| O | O | 0.1818660310787535 | 0.5729446022806588 | 0.0195329653773730 |

|   |   |                    |                    |                    |
|---|---|--------------------|--------------------|--------------------|
| O | O | 0.1803397983055418 | 0.5780304700443532 | 0.5196619409871700 |
| O | O | 0.1651590314008072 | 0.3944558152170593 | 0.2262500582067234 |
| O | O | 0.1311585361336018 | 0.3600411858835464 | 0.7531864472325690 |
| O | O | 0.0298137325757050 | 0.2483148148393602 | 0.2817991119658088 |
| O | O | 0.0043167695686026 | 0.1988112453920158 | 0.7834735051497409 |
| O | O | 0.8073961801787339 | 0.4431947774299523 | 0.2883952738474400 |
| O | O | 0.8284830338351122 | 0.4232266392370063 | 0.7809393813240931 |
| O | O | 0.8492600933288407 | 0.6237234264508005 | 0.0045280933861780 |
| O | O | 0.8170929543686040 | 0.6256724724811866 | 0.4915828716293200 |
| O | O | 0.8020316196232141 | 0.9504203374025670 | 0.3039192739472739 |
| O | O | 0.7725819238738727 | 0.9538803731468065 | 0.8043293356037796 |
| O | O | 0.5396730704290240 | 0.1791013607629464 | 0.3078219457569136 |
| O | O | 0.5413844834053452 | 0.1945710991054715 | 0.8118994245198353 |
| O | O | 0.3998443728499487 | 0.1631367360148197 | 0.9947307381533828 |
| O | O | 0.3836260896721719 | 0.1651062460583603 | 0.4997918263786524 |
| O | O | 0.2429370549880538 | 0.0479005218622669 | 0.0540433966021515 |
| O | O | 0.2254824613788164 | 0.0436418794731698 | 0.5546157533913396 |
| O | O | 0.4065291193293951 | 0.8367455021369348 | 0.0349078981129007 |
| O | O | 0.4524988765464428 | 0.8026807164733283 | 0.5492412866276086 |
| O | O | 0.6326894994391355 | 0.8433383279244939 | 0.2568222555687756 |
| O | O | 0.6231482957947988 | 0.8436211740170296 | 0.7283154061586529 |
| O | O | 0.0222544335040502 | 0.2007440287035101 | 0.4557005758074705 |
| O | O | 0.0360413045698845 | 0.2032999698614100 | 0.9595087102457559 |
| O | O | 0.7820060505507913 | 0.4314992719766270 | 0.4638104134679931 |
| O | O | 0.8070370695925918 | 0.4389129923107542 | 0.9568242838263203 |
| O | O | 0.9032808552952576 | 0.6183520581452444 | 0.2448337281924660 |
| O | O | 0.8802830198192294 | 0.6147053992881447 | 0.7618425196471577 |
| O | O | 0.9976828910239175 | 0.7953410898715882 | 0.2186195660512933 |
| O | O | 0.9864323971093548 | 0.7902651995151995 | 0.7251201032503877 |
| O | O | 0.1474719788431686 | 0.5848813139131901 | 0.1961865501407558 |
| O | O | 0.1940405356474448 | 0.5407521313698178 | 0.6956777318254310 |
| O | O | 0.1054912560639885 | 0.3780350079948750 | 0.5079792808581310 |
| O | O | 0.1295842775921947 | 0.3831920636274848 | 0.9909957407698876 |
| O | O | 0.2768645620402573 | 0.8922301895025256 | 0.1510788272072935 |
| O | O | 0.2995629246814137 | 0.8841480382604694 | 0.6132813076024072 |
| O | O | 0.6921301024557591 | 0.0907952906943840 | 0.3515443073495692 |
| O | O | 0.6957526430997368 | 0.1084940246620488 | 0.8602849748535351 |
| O | O | 0.1032618093954143 | 0.7245332970526550 | 0.0871831119946096 |
| O | O | 0.1143353015129755 | 0.6967126804458905 | 0.6406366758666577 |
| O | O | 0.8975470819854539 | 0.3154104129457170 | 0.3866677587137148 |
| O | O | 0.8907233291166887 | 0.2902199757582819 | 0.8910709591546554 |
| O | O | 0.2440602177551191 | 0.0872764090076090 | 0.3855517961659720 |
| O | O | 0.2618826195567971 | 0.0799373869354857 | 0.8822508762102711 |
| O | O | 0.4906495540953910 | 0.8544596647950656 | 0.3934958306984788 |
| O | O | 0.5186358643664485 | 0.8687709285475356 | 0.8907368963481521 |
| O | O | 0.7701323109877923 | 0.9045855601301540 | 0.1353507472705608 |

|    |    |                    |                    |                    |
|----|----|--------------------|--------------------|--------------------|
| O  | O  | 0.7777085836221950 | 0.9271588333245968 | 0.6304055415851445 |
| O  | O  | 0.5168022581109822 | 0.1455248924398840 | 0.1372803581786384 |
| O  | O  | 0.5277370732128418 | 0.1657633630855005 | 0.6401194566844045 |
| O  | O  | 0.9316215751710426 | 0.7461548512941203 | 0.3799162437685003 |
| O  | O  | 0.9034991545086094 | 0.7590147702326615 | 0.8809810478787162 |
| O  | O  | 0.1338370161815688 | 0.5162519957784650 | 0.3620828815129550 |
| O  | O  | 0.1204080096817183 | 0.5127360796521374 | 0.8588860269265846 |
| O  | O  | 0.1018633515606067 | 0.2457825642017203 | 0.1198613455092232 |
| O  | O  | 0.0712837178877977 | 0.2292740357577033 | 0.6233809681544257 |
| O  | O  | 0.8579137481175655 | 0.4806566775012148 | 0.1216728038761233 |
| O  | O  | 0.8390823973118533 | 0.4980205451813597 | 0.6214001209659993 |
| O  | O  | 0.2181061797663949 | 0.2219414209831631 | 0.2609729830148149 |
| O  | O  | 0.1946586048909623 | 0.1885625884249369 | 0.7532955972312467 |
| O  | O  | 0.7570516523368737 | 0.7835462412176610 | 0.9928252843193097 |
| O  | O  | 0.8000778585342326 | 0.8139843000389333 | 0.4882477704038092 |
| O  | O  | 0.8012438558151327 | 0.7668392641324767 | 0.2508689225494125 |
| O  | O  | 0.7910614085183484 | 0.7729537564992547 | 0.7382876615370931 |
| O  | O  | 0.2286132996388757 | 0.2289594811400492 | 0.9886380059937779 |
| O  | O  | 0.2111638179337759 | 0.2277580999241312 | 0.5017961859609062 |
| O  | O  | 0.5035287860337242 | 0.0132158055009043 | 0.0051807992226962 |
| O  | O  | 0.4874474646477943 | 0.9990965286242379 | 0.5207726615189028 |
| O  | O  | 0.9935135692067983 | 0.5083298321174441 | 0.9930138336003724 |
| O  | O  | 0.9674775144774409 | 0.5223861668791042 | 0.4853180786771583 |
| O  | O  | 0.4972994370136012 | 0.9916126662666750 | 0.2487504546001912 |
| O  | O  | 0.5102755616670260 | 0.0093589075305957 | 0.7466575712991831 |
| O  | O  | 0.9943428245394648 | 0.4590352837281279 | 0.2427789462219915 |
| O  | O  | 0.0037918167782480 | 0.4873642973795034 | 0.7147221184856966 |
| O  | O  | 0.0948138576099820 | 0.9167544163489723 | 0.1011493827780942 |
| O  | O  | 0.1059613093817860 | 0.8886498113961389 | 0.6082244814087355 |
| O  | O  | 0.2909577861676976 | 0.6995502791395706 | 0.1230561524489766 |
| O  | O  | 0.3065293919362178 | 0.6892370739765823 | 0.6231100509480562 |
| O  | O  | 0.8874172613510110 | 0.1241851345543243 | 0.3448714140116601 |
| O  | O  | 0.8849495583274606 | 0.0930657265372419 | 0.8922948333999851 |
| O  | O  | 0.7042785029154863 | 0.2886528057652827 | 0.3527430929156202 |
| O  | O  | 0.6989992773086978 | 0.3038076727297945 | 0.8642935498869586 |
| O  | O  | 0.3224126728970960 | 0.5398082745923278 | 0.2892310598613552 |
| O  | O  | 0.4945477124959473 | 0.6665057492442416 | 0.3279474885828723 |
| O  | O  | 0.3875652074710527 | 0.6007880610130096 | 0.4655231475443389 |
| Si | Si | 0.5018680864888272 | 0.1279535449509037 | 0.0321701742651323 |
| Si | Si | 0.7191491793078698 | 0.8805444946909203 | 0.0396039308239869 |
| Si | Si | 0.7530157802468885 | 0.9092235820426152 | 0.5242592143791427 |
| Si | Si | 0.2542495881745108 | 0.1147342603892121 | 0.2810006981735391 |
| Si | Si | 0.2576929586857040 | 0.0993425884731495 | 0.7756517977489295 |
| Si | Si | 0.8901856694266819 | 0.5014880243669136 | 0.2246855001235400 |
| Si | Si | 0.8888514282891025 | 0.5067111935255869 | 0.7188087884149307 |
| Si | Si | 0.1280557638523069 | 0.2763181127314456 | 0.2226460082156260 |

|    |    |                    |                    |                    |
|----|----|--------------------|--------------------|--------------------|
| Si | Si | 0.1008444913569518 | 0.2446182634695274 | 0.7266829522220232 |
| Si | Si | 0.1056978352078100 | 0.4930021958242951 | 0.9648112410839159 |
| Si | Si | 0.8786289392912285 | 0.7346844555444000 | 0.4770810463642370 |
| Si | Si | 0.8623366036939617 | 0.7403295536448189 | 0.9818751847982142 |
| Si | Si | 0.5187253768585464 | 0.8953487760557188 | 0.4941575681854239 |
| Si | Si | 0.5079192118217797 | 0.8955627595923216 | 0.9934499155572679 |
| Si | Si | 0.2681481579672528 | 0.1316609584171177 | 0.4856044849302500 |
| Si | Si | 0.2827463553574303 | 0.1297127874898672 | 0.9803584052058071 |
| Si | Si | 0.4811129663493249 | 0.1045350154891197 | 0.2356724161767667 |
| Si | Si | 0.4847442883427884 | 0.1193775210116835 | 0.7403618221891549 |
| Si | Si | 0.7475161555557276 | 0.8661956693919644 | 0.2376013031626746 |
| Si | Si | 0.7483128605700567 | 0.8770241352750339 | 0.7252271538504030 |
| Si | Si | 0.1122119133538746 | 0.4890359347537764 | 0.2573013278863977 |
| Si | Si | 0.1119163699771745 | 0.4746648520939859 | 0.7559564564116442 |
| Si | Si | 0.9074974660626486 | 0.7327249433736268 | 0.2741808646687491 |
| Si | Si | 0.8918428804915922 | 0.7327270117670873 | 0.7764886888103135 |
| Si | Si | 0.8784974163811237 | 0.5134627330541996 | 0.0192835888093141 |
| Si | Si | 0.8541930835894270 | 0.5184333610731108 | 0.5147923630535944 |
| Si | Si | 0.1240080220372146 | 0.2667296202542723 | 0.0150740745436887 |
| Si | Si | 0.2006600672006011 | 0.9731341553858114 | 0.1322657996274962 |
| Si | Si | 0.2121269959765289 | 0.9541993302854467 | 0.6249871492453714 |
| Si | Si | 0.3508318766052356 | 0.8122328396136457 | 0.1283495004886393 |
| Si | Si | 0.3686111843938914 | 0.7973059113202945 | 0.6311447381036377 |
| Si | Si | 0.7943659684396078 | 0.0441317742019737 | 0.3677649642457628 |
| Si | Si | 0.7754070913912601 | 0.0340569520796912 | 0.8851058494794084 |
| Si | Si | 0.6330306197146567 | 0.1995342711856549 | 0.8820277720203930 |
| Si | Si | 0.0337143652262016 | 0.8084652865558405 | 0.1153876454305498 |
| Si | Si | 0.0436480142456852 | 0.7826984993498665 | 0.6303337101190191 |
| Si | Si | 0.1787212522836637 | 0.6443573832053522 | 0.1057378759008396 |
| Si | Si | 0.1987009790238048 | 0.6257989147714472 | 0.6188104057082231 |
| Si | Si | 0.9598593746468251 | 0.2233102247473436 | 0.3679702174918051 |
| Si | Si | 0.9543885215223868 | 0.1976653769924312 | 0.8812495047266035 |
| Si | Si | 0.7979900944521786 | 0.3688842393943333 | 0.3736469069153635 |
| Si | Si | 0.8080251945505201 | 0.3640904828389788 | 0.8735312235306880 |
| Si | Si | 0.1033576154660097 | 0.2620870477453893 | 0.5216143239698476 |
| Si | Si | 0.6345299010361986 | 0.1865587766167866 | 0.3738674806064900 |
| Al | Al | 0.0844836591775683 | 0.4924644077175456 | 0.4718123922749426 |
| Al | Al | 0.5167858516597088 | 0.8729820979271349 | 0.2768042539442933 |
| Al | Al | 0.5094943774993268 | 0.8885992501285337 | 0.7797420875674117 |
| Al | Al | 0.4945391263569502 | 0.1262453235155117 | 0.5232342733443992 |
| Cu | Cu | 0.2712991077484496 | 0.5648433076525038 | 0.4087700272417908 |
| Cu | Cu | 0.4513001087590216 | 0.7130685150345941 | 0.4291736663070178 |
| Cu | Cu | 0.3901948456963860 | 0.6590129598225530 | 0.2488506874967022 |
| C  | C  | 0.4132272188612200 | 0.3837865266481851 | 0.1362713564751885 |
| H  | H  | 0.5828892784146581 | 0.2186322673816392 | 0.6412920868770857 |
| H  | H  | 0.6006976634296581 | 0.7820029044106701 | 0.6969710049008295 |

|   |   |                    |                    |                    |
|---|---|--------------------|--------------------|--------------------|
| H | H | 0.3357667529726495 | 0.3553891411442996 | 0.1282749437454284 |
| H | H | 0.4474206139317024 | 0.4395653040427200 | 0.0903898919517197 |
| H | H | 0.3695129437767901 | 0.4915008437299087 | 0.2943171617734073 |
| H | H | 0.4579643205289970 | 0.3506301096405900 | 0.1850751076882923 |

G. O(3) Initial geometry ([Cu<sub>3</sub>(μ-O)<sub>3</sub>]-MOR + CH<sub>4</sub>)

data\_MORwithtwoAlinSPand2Alfa

\_cell\_length\_a 13.647634  
 \_cell\_length\_b 13.647634  
 \_cell\_length\_c 15.015110  
 \_cell\_angle\_alpha 90.000000  
 \_cell\_angle\_beta 90.000000  
 \_cell\_angle\_gamma 97.178906

loop\_

\_symmetry\_equiv\_pos\_as\_xyz

+x,+y,+z

loop\_

\_atom\_site\_type\_symbol

\_atom\_site\_label

\_atom\_site\_fract\_x

\_atom\_site\_fract\_y

\_atom\_site\_fract\_z

|   |   |                    |                    |                    |
|---|---|--------------------|--------------------|--------------------|
| O | O | 0.1832791687147079 | 0.0326819572708668 | 0.2246351180998296 |
| O | O | 0.2151452783848418 | 0.9971614026035822 | 0.7268520462498296 |
| O | O | 0.4243326991481461 | 0.7940164753429400 | 0.2169729651102900 |
| O | O | 0.4242741411075877 | 0.8086033089397540 | 0.7256355529856824 |
| O | O | 0.6350644995049886 | 0.8871872627752762 | 0.5119029514754928 |
| O | O | 0.6014867810030954 | 0.8572707144063243 | 0.0480031235263865 |
| O | O | 0.7999545484847413 | 0.0089563688668338 | 0.4713862382775632 |
| O | O | 0.7505485368708411 | 0.9761988939819765 | 0.9777502878220917 |
| O | O | 0.6014250462523697 | 0.1872082741128533 | 0.4776272759529761 |
| O | O | 0.5942704030162222 | 0.1978997643847895 | 0.9831788829747637 |
| O | O | 0.3643286228122556 | 0.1205780034523987 | 0.2441319495985478 |
| O | O | 0.3698980083183034 | 0.1339378245542403 | 0.7400251375488121 |
| O | O | 0.9411992081495757 | 0.8036372064739343 | 0.0472558857114590 |
| O | O | 0.9654282467164652 | 0.7546308171136703 | 0.5511177492483282 |
| O | O | 0.1814084751158453 | 0.5723991660240176 | 0.0198434564331197 |
| O | O | 0.1822681606165348 | 0.5748258099022776 | 0.5189121266212681 |
| O | O | 0.1676149430887354 | 0.3968257586539810 | 0.2279045040772483 |
| O | O | 0.1306819134166807 | 0.3603022724364640 | 0.7510181106790398 |
| O | O | 0.0302327733413824 | 0.2513237504021431 | 0.2823502790149697 |
| O | O | 0.0052594018735884 | 0.1984569629543287 | 0.7839937029434564 |
| O | O | 0.8085111103566192 | 0.4423335249727917 | 0.2882754869192999 |
| O | O | 0.8308036333558055 | 0.4234469009165665 | 0.7811385965015317 |



|   |   |                    |                    |                    |
|---|---|--------------------|--------------------|--------------------|
| O | O | 0.8535810308371123 | 0.6239526031671145 | 0.0050698839831755 |
| O | O | 0.8166516200052754 | 0.6261893529526060 | 0.4919655087878944 |
| O | O | 0.8008139575070291 | 0.9501271137887524 | 0.3031516064609359 |
| O | O | 0.7767113478002770 | 0.9553379565721618 | 0.8044621115709247 |
| O | O | 0.5384169736654545 | 0.1783219313989738 | 0.3105320789104895 |
| O | O | 0.5440499891515945 | 0.1966153274557715 | 0.8110319549710083 |
| O | O | 0.4010280726210554 | 0.1594403528648431 | 0.9927765113227085 |
| O | O | 0.3836740661533491 | 0.1654606543727019 | 0.4999236078818765 |
| O | O | 0.2456178413287017 | 0.0444727042082333 | 0.0546954738069928 |
| O | O | 0.2260805063736925 | 0.0433536524259336 | 0.5544646596655840 |
| O | O | 0.4089572839568248 | 0.8412285474899931 | 0.0411748450451405 |
| O | O | 0.4560995908783457 | 0.8051267811256301 | 0.5512161885519186 |
| O | O | 0.6309009767993378 | 0.8442856532425985 | 0.2554502972575409 |
| O | O | 0.6237546700845029 | 0.8452877517976061 | 0.7321046711591613 |
| O | O | 0.0214635830180388 | 0.1981402221939071 | 0.4548400016583177 |
| O | O | 0.0388414671809909 | 0.2024187625200084 | 0.9599198536802392 |
| O | O | 0.7818570374066331 | 0.4320316169802465 | 0.4634671820581657 |
| O | O | 0.8074761780292874 | 0.4396386423778916 | 0.9567666194518479 |
| O | O | 0.9029233349635726 | 0.6179953448661529 | 0.2448432733832371 |
| O | O | 0.8791740586493964 | 0.6151275057955993 | 0.7610662812367101 |
| O | O | 0.9946440073409720 | 0.7961800693122452 | 0.2181941959706758 |
| O | O | 0.9886205303831312 | 0.7882132107813622 | 0.7242404125519402 |
| O | O | 0.1484186175823524 | 0.5861764427791597 | 0.1966137770556249 |
| O | O | 0.1954083136514978 | 0.5406659851037260 | 0.6948636851337608 |
| O | O | 0.1029428627454041 | 0.3755734097953033 | 0.5073389745871276 |
| O | O | 0.1329414237485718 | 0.3823258068651947 | 0.9889137004758176 |
| O | O | 0.2783081951542575 | 0.8923608644076377 | 0.1578463219302179 |
| O | O | 0.2997615439574131 | 0.8832734983005991 | 0.6124913039881418 |
| O | O | 0.6919490016356876 | 0.0906551889020254 | 0.3521525993195115 |
| O | O | 0.6942142625514969 | 0.1056729938583976 | 0.8619176682366688 |
| O | O | 0.0995977687596863 | 0.7222487646005203 | 0.0876728779141289 |
| O | O | 0.1168802754392923 | 0.6963529993149397 | 0.6367999477838876 |
| O | O | 0.8972995919516304 | 0.3149287725132163 | 0.3880899371629973 |
| O | O | 0.8960813915713499 | 0.2934326378559975 | 0.8923205841430067 |
| O | O | 0.2439337960683554 | 0.0877517132077251 | 0.3855017718441046 |
| O | O | 0.2594801683013879 | 0.0793814194188519 | 0.8828091213397772 |
| O | O | 0.4912870772995435 | 0.8552789653495665 | 0.3916835985513032 |
| O | O | 0.5139810994991590 | 0.8730712999533400 | 0.8924077887940233 |
| O | O | 0.7707116670164849 | 0.9016530474135760 | 0.1349184068374304 |
| O | O | 0.7756354561620937 | 0.9288124954637942 | 0.6306130796037487 |
| O | O | 0.5161907414530447 | 0.1533018398901159 | 0.1383497354867169 |
| O | O | 0.5269877436876181 | 0.1676244466436138 | 0.6397891945286345 |
| O | O | 0.9309669660963182 | 0.7460419714350401 | 0.3796986498581706 |
| O | O | 0.9053911213230624 | 0.7588498283641626 | 0.8802186065328651 |
| O | O | 0.1332379516337017 | 0.5174342700438211 | 0.3634524627350027 |
| O | O | 0.1216388890371127 | 0.5126641107800204 | 0.8581882535806732 |

|    |    |                    |                    |                    |
|----|----|--------------------|--------------------|--------------------|
| O  | O  | 0.1016393823623615 | 0.2490681701446447 | 0.1208760143734602 |
| O  | O  | 0.0700835946577421 | 0.2275851140854286 | 0.6230967016722063 |
| O  | O  | 0.8602444557419203 | 0.4798369044861078 | 0.1216967412379225 |
| O  | O  | 0.8386801394054719 | 0.4976624026931497 | 0.6214337056976420 |
| O  | O  | 0.2179683354523396 | 0.2238105367142086 | 0.2621256403979724 |
| O  | O  | 0.1950941402132169 | 0.1888269377112198 | 0.7526083536001382 |
| O  | O  | 0.7582304414413084 | 0.7816533942954873 | 0.9912007586481479 |
| O  | O  | 0.8011580039527143 | 0.8145902749324869 | 0.4898039560721833 |
| O  | O  | 0.7983971897106743 | 0.7652088136948906 | 0.2527383800720852 |
| O  | O  | 0.7928979774246542 | 0.7748184025412460 | 0.7374430213849854 |
| O  | O  | 0.2305384474825826 | 0.2270751913446103 | 0.9924909786916507 |
| O  | O  | 0.2105735965732532 | 0.2272376900320764 | 0.5020909950331319 |
| O  | O  | 0.5116745828276639 | 0.0150976992278179 | 0.0118635848851347 |
| O  | O  | 0.4879762430673492 | 0.0000054771600480 | 0.5182482239579352 |
| O  | O  | 0.9946017881340569 | 0.5049678803408552 | 0.9922785714505992 |
| O  | O  | 0.9671281493031996 | 0.5234416085394130 | 0.4860447212133625 |
| O  | O  | 0.4969812606944503 | 0.9944160723078579 | 0.2436581827381357 |
| O  | O  | 0.5103878791674767 | 0.0113983178905661 | 0.7456715065296733 |
| O  | O  | 0.9957267524426502 | 0.4598334933390608 | 0.2444576499766888 |
| O  | O  | 0.0049325412031155 | 0.4900889807123739 | 0.7136425619428260 |
| O  | O  | 0.0969906468281481 | 0.9154664079857131 | 0.1025118849717973 |
| O  | O  | 0.1067141631198225 | 0.8886882163786575 | 0.6083516693604162 |
| O  | O  | 0.2893969877783447 | 0.7019477777683478 | 0.1189284628446914 |
| O  | O  | 0.3093718573773723 | 0.6889202660375254 | 0.6218112089665806 |
| O  | O  | 0.8871529073583803 | 0.1245258987809612 | 0.3421561908165820 |
| O  | O  | 0.8847325856893654 | 0.0957081721578310 | 0.8941757811141033 |
| O  | O  | 0.7043740905748440 | 0.2883372380254210 | 0.3526226503396901 |
| O  | O  | 0.7036289936998520 | 0.3015775488330514 | 0.8635296142814669 |
| O  | O  | 0.3191034833167479 | 0.5572325212301351 | 0.3009803104500844 |
| O  | O  | 0.5211942296156350 | 0.6604805283548814 | 0.3275686768683635 |
| O  | O  | 0.3774820915329997 | 0.6072208861931278 | 0.4637224413195047 |
| Si | Si | 0.5040169454839422 | 0.1300160219090134 | 0.0336532363854496 |
| Si | Si | 0.7206540485634039 | 0.8783752169944293 | 0.0385591044276278 |
| Si | Si | 0.7536853320968787 | 0.9102801289599062 | 0.5241451603590894 |
| Si | Si | 0.2534959166911330 | 0.1165152082669455 | 0.2811215586853383 |
| Si | Si | 0.2579745665150457 | 0.0997296398036492 | 0.7763412758899125 |
| Si | Si | 0.8911617332747958 | 0.5010045382909579 | 0.2249239332487963 |
| Si | Si | 0.8892561264872920 | 0.5074122368906019 | 0.7185805453263311 |
| Si | Si | 0.1288681944959506 | 0.2789079927557871 | 0.2235427581517339 |
| Si | Si | 0.1009175229780243 | 0.2442955154284839 | 0.7260632276814820 |
| Si | Si | 0.1072520270901711 | 0.4918483451628606 | 0.9642537717803326 |
| Si | Si | 0.8788175969084947 | 0.7349436146642836 | 0.4771905252390345 |
| Si | Si | 0.8644120555457261 | 0.7401349053305989 | 0.9812177214685536 |
| Si | Si | 0.5191464712701205 | 0.8957601342115054 | 0.4928704664445879 |
| Si | Si | 0.5092523927452638 | 0.8971441012772168 | 0.9962117071189343 |
| Si | Si | 0.2682931359722639 | 0.1316322114435236 | 0.4855748215413412 |

|    |    |                    |                    |                    |
|----|----|--------------------|--------------------|--------------------|
| Si | Si | 0.2832871571341877 | 0.1273247167227586 | 0.9812141157180519 |
| Si | Si | 0.4802756812266757 | 0.1079964466022493 | 0.2354949825898616 |
| Si | Si | 0.4854193113499670 | 0.1217750544062741 | 0.7404652750702673 |
| Si | Si | 0.7464272231742877 | 0.8653462021939784 | 0.2373574949734953 |
| Si | Si | 0.7489310859272778 | 0.8784940078292992 | 0.7259624623674148 |
| Si | Si | 0.1134611199944407 | 0.4906801797782910 | 0.2573226247963434 |
| Si | Si | 0.1124092186796198 | 0.4751343151543840 | 0.7552170832253861 |
| Si | Si | 0.9056959198355026 | 0.7323366243188332 | 0.2741374763120870 |
| Si | Si | 0.8928410214743968 | 0.7331566024603373 | 0.7757388617195785 |
| Si | Si | 0.8805524223484184 | 0.5127858029665984 | 0.0192141661667846 |
| Si | Si | 0.8533297259730507 | 0.5188760482641263 | 0.5150023651299341 |
| Si | Si | 0.1260167667906931 | 0.2665625992979677 | 0.0161362428611462 |
| Si | Si | 0.2022523632081799 | 0.9723044168221315 | 0.1345975238428853 |
| Si | Si | 0.2131057689430611 | 0.9539602738821426 | 0.6248994466656952 |
| Si | Si | 0.3508748460509756 | 0.8112057405503321 | 0.1325420852990348 |
| Si | Si | 0.3705141242886264 | 0.7979626865551183 | 0.6308535575333999 |
| Si | Si | 0.7946551243723913 | 0.0442384905475578 | 0.3669424850052208 |
| Si | Si | 0.7766472164983372 | 0.0340823924366832 | 0.8860926215948359 |
| Si | Si | 0.6346471108699794 | 0.1993744081163719 | 0.8820285948503245 |
| Si | Si | 0.0329944997802477 | 0.8086393638096946 | 0.1155480925465297 |
| Si | Si | 0.0452182468183532 | 0.7820399000709616 | 0.6290403952085087 |
| Si | Si | 0.1785513455505937 | 0.6451115806366763 | 0.1053318110934209 |
| Si | Si | 0.2017986063801409 | 0.6255119820645066 | 0.6180473662864826 |
| Si | Si | 0.9595263150508039 | 0.2231801184937298 | 0.3673456887163234 |
| Si | Si | 0.9564884826481957 | 0.1984724033079776 | 0.8822283301307710 |
| Si | Si | 0.7979545105302586 | 0.3685508503939554 | 0.3738053712944794 |
| Si | Si | 0.8110560764575202 | 0.3644658893384526 | 0.8739242075787291 |
| Si | Si | 0.1019644759554036 | 0.2594846631051959 | 0.5211174290622708 |
| Si | Si | 0.6344697121066802 | 0.1865103721740693 | 0.3748704986301643 |
| Al | Al | 0.0824198147093827 | 0.4901598714425755 | 0.4730839705454495 |
| Al | Al | 0.5162880929589926 | 0.8779401751552188 | 0.2752761882079347 |
| Al | Al | 0.5079818268356646 | 0.8912531585151031 | 0.7809462255831062 |
| Al | Al | 0.4948907000203653 | 0.1267797283032286 | 0.5230001646575526 |
| Cu | Cu | 0.2636097476811626 | 0.5680478881649602 | 0.4092498543131262 |
| Cu | Cu | 0.4609954786767832 | 0.7098536791074446 | 0.4241974819080183 |
| Cu | Cu | 0.4067128310729998 | 0.6570637930691970 | 0.2648136466437158 |
| C  | C  | 0.4776942512332318 | 0.4940387295112829 | 0.6414632685023561 |
| H  | H  | 0.5820900211377233 | 0.2206077880806455 | 0.6403008671493718 |
| H  | H  | 0.6011248294533936 | 0.7824427720256608 | 0.7027770390070792 |
| H  | H  | 0.4134848863626253 | 0.4587137984972877 | 0.6784822240736362 |
| H  | H  | 0.4528025937811085 | 0.5228949170312780 | 0.5782433718503763 |
| H  | H  | 0.5154750534542177 | 0.5545842706421406 | 0.6816276872786814 |
| H  | H  | 0.5289537388254871 | 0.4400157123316232 | 0.6277597047906464 |

H. O(3) Transition state ([Cu<sub>3</sub>(μ-O)<sub>3</sub>]-MOR•••CH<sub>4</sub>)

data\_MORwithtwoAlinSPand2Alfa

\_cell\_length\_a 13.647634  
\_cell\_length\_b 13.647634  
\_cell\_length\_c 15.015110  
\_cell\_angle\_alpha 90.000000  
\_cell\_angle\_beta 90.000000  
\_cell\_angle\_gamma 97.178906

loop\_

\_symmetry\_equiv\_pos\_as\_xyz

+x,+y,+z

loop\_

\_atom\_site\_type\_symbol

\_atom\_site\_label

\_atom\_site\_fract\_x

\_atom\_site\_fract\_y

\_atom\_site\_fract\_z

|   |   |                    |                    |                    |
|---|---|--------------------|--------------------|--------------------|
| O | O | 0.1836933087924848 | 0.0325315640022339 | 0.2246887247310596 |
| O | O | 0.2140144450280062 | 0.9974433053878684 | 0.7272313066786040 |
| O | O | 0.4238176202743915 | 0.7927477002847851 | 0.2183083771161236 |
| O | O | 0.4243247012595717 | 0.8079051783077986 | 0.7259648267773429 |
| O | O | 0.6339517270551767 | 0.8863439388559087 | 0.5131249106306015 |
| O | O | 0.6009068110388540 | 0.8588915140743865 | 0.0491244038536109 |
| O | O | 0.7988681184397848 | 0.0085304206891692 | 0.4718754534028378 |
| O | O | 0.7488666803829744 | 0.9768390340067938 | 0.9775116257921823 |
| O | O | 0.6010875911586595 | 0.1859484374809384 | 0.4775544272797134 |
| O | O | 0.5936683901823301 | 0.1968486158063882 | 0.9832623978981800 |
| O | O | 0.3649145818003703 | 0.1190900603373564 | 0.2446215300804440 |
| O | O | 0.3699767159091039 | 0.1321860624611659 | 0.7388627038837825 |
| O | O | 0.9413182038170689 | 0.8035272930414692 | 0.0478118645776533 |
| O | O | 0.9641179186990811 | 0.7560305163480194 | 0.5521115943462505 |
| O | O | 0.1821062008437977 | 0.5720383756867022 | 0.0204248522030497 |
| O | O | 0.1852658504149005 | 0.5733852031757962 | 0.5220006915600734 |
| O | O | 0.1679645139814667 | 0.3970308766985298 | 0.2291698532398172 |
| O | O | 0.1314740191186772 | 0.3604955498842202 | 0.7522006416425810 |
| O | O | 0.0318622908862025 | 0.2506978550622279 | 0.2842634059516982 |
| O | O | 0.0059573824142092 | 0.1985119810487461 | 0.7854050781875230 |
| O | O | 0.8088754528220932 | 0.4419500386697379 | 0.2882565639779529 |
| O | O | 0.8297862039571484 | 0.4233931736992673 | 0.7808265311051272 |
| O | O | 0.8520423472329242 | 0.6244563961221772 | 0.0058926534444055 |
| O | O | 0.8178578246795922 | 0.6259432437682051 | 0.4916029880050559 |
| O | O | 0.8012630091002890 | 0.9501794493195490 | 0.3035933079267252 |
| O | O | 0.7750873858954392 | 0.9555827715164611 | 0.8044137937004905 |
| O | O | 0.5390004198115648 | 0.1777644320902141 | 0.3098827571744280 |
| O | O | 0.5432520515135764 | 0.1956874361749854 | 0.8109372955464949 |
| O | O | 0.4004830289552999 | 0.1625472546330968 | 0.9937177902302778 |

|   |   |                    |                    |                    |
|---|---|--------------------|--------------------|--------------------|
| O | O | 0.3836016345094961 | 0.1654936219897536 | 0.5002622586564272 |
| O | O | 0.2456799648580628 | 0.0455956161018349 | 0.0548678043282251 |
| O | O | 0.2257794756062168 | 0.0433141449916477 | 0.5545179028375884 |
| O | O | 0.4090494193474612 | 0.8396576979092529 | 0.0414256903258163 |
| O | O | 0.4553656938427650 | 0.8026281147211591 | 0.5516263606183998 |
| O | O | 0.6314481531849339 | 0.8433141715621844 | 0.2571160270125148 |
| O | O | 0.6237055750539895 | 0.8445313714709854 | 0.7314892661125327 |
| O | O | 0.0215715436572523 | 0.1991262842251231 | 0.4570822583760332 |
| O | O | 0.0367497074093919 | 0.2035265451539345 | 0.9616935075554096 |
| O | O | 0.7840482408708311 | 0.4323828072450624 | 0.4638448464384339 |
| O | O | 0.8079212964151949 | 0.4402053434743252 | 0.9569207799820205 |
| O | O | 0.9026538214564397 | 0.6183400931054237 | 0.2455236255033668 |
| O | O | 0.8791004103585252 | 0.6148819975244564 | 0.7618617034121939 |
| O | O | 0.9963070722229475 | 0.7958972831858162 | 0.2183274787848006 |
| O | O | 0.9882163037060181 | 0.7883750017773608 | 0.7253606758667388 |
| O | O | 0.1502172521478471 | 0.5862325912580104 | 0.1976717967266310 |
| O | O | 0.1960152891435172 | 0.5417163123989468 | 0.6975949554861671 |
| O | O | 0.1040751877610404 | 0.3764395805191398 | 0.5095630887940175 |
| O | O | 0.1315654166925171 | 0.3826813960104047 | 0.9901844729975053 |
| O | O | 0.2793621782198130 | 0.8928879857902174 | 0.1572378658428448 |
| O | O | 0.2999806407372105 | 0.8841635587182779 | 0.6131944985388174 |
| O | O | 0.6935958263340183 | 0.0918967036108569 | 0.3519414880241953 |
| O | O | 0.6955284069531373 | 0.1079762050486863 | 0.8612711089950125 |
| O | O | 0.0998121900788931 | 0.7213419165310384 | 0.0875039628888885 |
| O | O | 0.1152906472404496 | 0.6959554286085279 | 0.6373889477094536 |
| O | O | 0.8968001209770549 | 0.3138358345289802 | 0.3879950253208264 |
| O | O | 0.8932116092496543 | 0.2920396341995755 | 0.8915800577756414 |
| O | O | 0.2437315337653487 | 0.0880653855695925 | 0.3856676099446332 |
| O | O | 0.2610891732660221 | 0.0795542262137516 | 0.8830460265051556 |
| O | O | 0.4897380347779574 | 0.8519752057925558 | 0.3930374917729367 |
| O | O | 0.5151005038650851 | 0.8708346688422282 | 0.8926061291601073 |
| O | O | 0.7699107992349354 | 0.9028688910294917 | 0.1354039873319692 |
| O | O | 0.7757453023015159 | 0.9279705625285715 | 0.6304969389431605 |
| O | O | 0.5161817881400808 | 0.1496644643151797 | 0.1379686809304275 |
| O | O | 0.5270638827653400 | 0.1664005556702719 | 0.6396665389404532 |
| O | O | 0.9315601404945539 | 0.7469250923636963 | 0.3799091578424409 |
| O | O | 0.9045032333494092 | 0.7590026295536774 | 0.8808573219993576 |
| O | O | 0.1372368605620125 | 0.5177462492262705 | 0.3651364539022737 |
| O | O | 0.1214382757874688 | 0.5126297717445141 | 0.8592880677135639 |
| O | O | 0.1021509800680107 | 0.2491585725280672 | 0.1220328319813859 |
| O | O | 0.0706608746649238 | 0.2276433051841735 | 0.6248118950860331 |
| O | O | 0.8615967396261368 | 0.4801316096472519 | 0.1223082580461963 |
| O | O | 0.8402446872679619 | 0.4984638276324205 | 0.6212522445385815 |
| O | O | 0.2194900424247592 | 0.2239361819138779 | 0.2619850541141062 |
| O | O | 0.1961569924688007 | 0.1895273142072824 | 0.7538357508702873 |
| O | O | 0.7577729538533688 | 0.7825832019887642 | 0.9919718707233471 |

|    |    |                    |                    |                    |
|----|----|--------------------|--------------------|--------------------|
| O  | O  | 0.7996803747757113 | 0.8137603934312239 | 0.4891650324431325 |
| O  | O  | 0.7998798581384321 | 0.7660987815137972 | 0.2520446684198632 |
| O  | O  | 0.7924838977257522 | 0.7745452562816411 | 0.7379292674279654 |
| O  | O  | 0.2290765362878489 | 0.2274795800093727 | 0.9914853558871997 |
| O  | O  | 0.2109064346592575 | 0.2274512899114285 | 0.5033062273168056 |
| O  | O  | 0.5073696786436557 | 0.0145648600151773 | 0.0086313915701055 |
| O  | O  | 0.4866353920057236 | 0.9986039634348742 | 0.5188315228986724 |
| O  | O  | 0.9944445027871467 | 0.5071191634562169 | 0.9923098237060586 |
| O  | O  | 0.9699698826376206 | 0.5245719008802396 | 0.4864902500750929 |
| O  | O  | 0.4977813793434009 | 0.9925992350715802 | 0.2460503318983811 |
| O  | O  | 0.5110921103179464 | 0.0100234805445467 | 0.7462605593496434 |
| O  | O  | 0.9970277589923668 | 0.4616430377882850 | 0.2467123672091418 |
| O  | O  | 0.0050157317870330 | 0.4895300424574103 | 0.7147363921273566 |
| O  | O  | 0.0978083876663476 | 0.9150788487979256 | 0.1020062348382282 |
| O  | O  | 0.1065554156387023 | 0.8884861425213586 | 0.6090537127984206 |
| O  | O  | 0.2895908774268818 | 0.7019496419936644 | 0.1189559499171011 |
| O  | O  | 0.3084757974688301 | 0.6894387420221406 | 0.6229572749700694 |
| O  | O  | 0.8891172927633022 | 0.1233559737851380 | 0.3438405761072332 |
| O  | O  | 0.8851042161122535 | 0.0946237487981421 | 0.8940592514565822 |
| O  | O  | 0.7032968365647818 | 0.2894466236153974 | 0.3539429826765002 |
| O  | O  | 0.7011857933274825 | 0.3036549188576672 | 0.8643830355719118 |
| O  | O  | 0.3259158973277124 | 0.5554890587550525 | 0.3022355289540913 |
| O  | O  | 0.5249292273885531 | 0.6604305568721378 | 0.3343596465241099 |
| O  | O  | 0.3951969490460839 | 0.5843206309979533 | 0.4720489999788683 |
| Si | Si | 0.5025538239794543 | 0.1293587586968883 | 0.0329282753452205 |
| Si | Si | 0.7199868226282433 | 0.8792971494384290 | 0.0390785450200113 |
| Si | Si | 0.7528153396012698 | 0.9096119953678254 | 0.5241216731969658 |
| Si | Si | 0.2540567086520085 | 0.1163478974990255 | 0.2811162329914865 |
| Si | Si | 0.2583033716599274 | 0.0996385024465596 | 0.7766766112809620 |
| Si | Si | 0.8920997976824836 | 0.5014168025573298 | 0.2257490932012942 |
| Si | Si | 0.8894739464292343 | 0.5073280571513195 | 0.7188798880854392 |
| Si | Si | 0.1298271648626752 | 0.2792501417419189 | 0.2247003121057105 |
| Si | Si | 0.1014376360311573 | 0.2444234295320342 | 0.7276715176985817 |
| Si | Si | 0.1069041840029570 | 0.4924164524287207 | 0.9653180628775786 |
| Si | Si | 0.8787250541000304 | 0.7352466930195760 | 0.4769963388655682 |
| Si | Si | 0.8637646323622263 | 0.7407397177069655 | 0.9819575116786012 |
| Si | Si | 0.5181385694794045 | 0.8945784930094476 | 0.4925644853444879 |
| Si | Si | 0.5083871217316513 | 0.8965094355491274 | 0.9960555173256864 |
| Si | Si | 0.2681650783163647 | 0.1316811000476932 | 0.4856468155937037 |
| Si | Si | 0.2831605015286272 | 0.1285293803891889 | 0.9813760470960204 |
| Si | Si | 0.4807259666283983 | 0.1058993556663168 | 0.2356784624008981 |
| Si | Si | 0.4854923753264728 | 0.1200640032851013 | 0.7403117263996108 |
| Si | Si | 0.7465575878763602 | 0.8655027426884558 | 0.2378306868252480 |
| Si | Si | 0.7488740196533854 | 0.8783650272119914 | 0.7259698136564765 |
| Si | Si | 0.1153420369163598 | 0.4917235441934480 | 0.2599230440382740 |
| Si | Si | 0.1123938352377465 | 0.4750807430799000 | 0.7565553388059101 |

|    |    |                    |                    |                    |
|----|----|--------------------|--------------------|--------------------|
| Si | Si | 0.9068398575984489 | 0.7328715175547131 | 0.2741503983724201 |
| Si | Si | 0.8923522674148643 | 0.7329487264190604 | 0.7764993554342396 |
| Si | Si | 0.8803700054684285 | 0.5137260132869699 | 0.0198104579086262 |
| Si | Si | 0.8561613285547196 | 0.5193736265767228 | 0.5147289128874348 |
| Si | Si | 0.1251787277611953 | 0.2670458992930307 | 0.0171800751362881 |
| Si | Si | 0.2028051713151129 | 0.9723941395244609 | 0.1344282785575786 |
| Si | Si | 0.2125325846865564 | 0.9544105112865040 | 0.6252600628776577 |
| Si | Si | 0.3513161794231010 | 0.8105661502475101 | 0.1333588717092695 |
| Si | Si | 0.3697256777409663 | 0.7983047008546649 | 0.6315902862564400 |
| Si | Si | 0.7953892614437663 | 0.0442048280908693 | 0.3673998474163369 |
| Si | Si | 0.7761733949956593 | 0.0346908721312289 | 0.8860535712097146 |
| Si | Si | 0.6339416500034929 | 0.2000651360853425 | 0.8821218580333934 |
| Si | Si | 0.0339063048853774 | 0.8081248809187045 | 0.1153665597657252 |
| Si | Si | 0.0442625152822274 | 0.7823415211820333 | 0.6299512705934660 |
| Si | Si | 0.1793212942630120 | 0.6446660804358473 | 0.1059181327990544 |
| Si | Si | 0.2008015299799979 | 0.6256316732788321 | 0.6198291098890465 |
| Si | Si | 0.9603784130744941 | 0.2228366415584375 | 0.3687665542196967 |
| Si | Si | 0.9556053097766295 | 0.1984002490981851 | 0.8828992328624281 |
| Si | Si | 0.7981092117573354 | 0.3685112732702507 | 0.3739415524857890 |
| Si | Si | 0.8097168625218600 | 0.3649760213450719 | 0.8738850624247050 |
| Si | Si | 0.1025023011367239 | 0.2603099216618574 | 0.5231051376444569 |
| Si | Si | 0.6345945727104407 | 0.1864979900848525 | 0.3747608042198323 |
| Al | Al | 0.0855655095038728 | 0.4913445037864079 | 0.4731258648846861 |
| Al | Al | 0.5160474711200891 | 0.8750509674325215 | 0.2773193335815662 |
| Al | Al | 0.5086494926618457 | 0.8897358065760059 | 0.7814502783584771 |
| Al | Al | 0.4944712013743953 | 0.1258552881851003 | 0.5227869710170125 |
| Cu | Cu | 0.2727969464474511 | 0.5604009261151582 | 0.4137598172585161 |
| Cu | Cu | 0.4699558126242559 | 0.7043449982660331 | 0.4370548055272525 |
| Cu | Cu | 0.4121900476863207 | 0.6570666845026873 | 0.2714290195968322 |
| C  | C  | 0.4627753368812995 | 0.5079081514601007 | 0.6138099594539922 |
| H  | H  | 0.5848117741731969 | 0.2163832192618358 | 0.6401054167493214 |
| H  | H  | 0.6014161057297258 | 0.7827215620838288 | 0.7005110206070668 |
| H  | H  | 0.3962125452081465 | 0.4696694532614616 | 0.6447054309819447 |
| H  | H  | 0.4156787410516604 | 0.5500498956981524 | 0.5343268636290316 |
| H  | H  | 0.4977462949805552 | 0.5729723295421461 | 0.6491107737692110 |
| H  | H  | 0.5120073801453550 | 0.4625868966258306 | 0.5802245049944890 |

I. O(3) Final geometry ([Cu<sub>3</sub>(μ-OH)(μ-O)<sub>2</sub>]-MOR + CH<sub>3</sub>)

```

data_MORwithtwoAlinSPand2Alfa
_cell_length_a 13.647634
_cell_length_b 13.647634
_cell_length_c 15.015110
_cell_angle_alpha 90.000000
_cell_angle_beta 90.000000

```

\_cell\_angle\_gamma 97.178906

loop\_

\_symmetry\_equiv\_pos\_as\_xyz

+x,+y,+z

loop\_

\_atom\_site\_type\_symbol

\_atom\_site\_label

\_atom\_site\_fract\_x

\_atom\_site\_fract\_y

\_atom\_site\_fract\_z

|   |   |                    |                    |                    |
|---|---|--------------------|--------------------|--------------------|
| O | O | 0.1831024965803094 | 0.0318886490755527 | 0.2244965686789506 |
| O | O | 0.2125591661959324 | 0.9982055155386940 | 0.7279034606055330 |
| O | O | 0.4272779563290361 | 0.7998240682264639 | 0.2095557519641009 |
| O | O | 0.4261955616570300 | 0.8084617541168857 | 0.7240582881775114 |
| O | O | 0.6325829095431450 | 0.8871886050543045 | 0.5123137588361528 |
| O | O | 0.5958478855550710 | 0.8581168574951589 | 0.0477755054414945 |
| O | O | 0.7979165536791447 | 0.0080772758562163 | 0.4694179767225018 |
| O | O | 0.7433365658643025 | 0.9747926588704664 | 0.9742823033643134 |
| O | O | 0.6011490396600625 | 0.1836050425108411 | 0.4766832002969669 |
| O | O | 0.5942353826282737 | 0.1927031758648492 | 0.9830952059180909 |
| O | O | 0.3656145979310480 | 0.1128964985388427 | 0.2456127796352353 |
| O | O | 0.3701136105793318 | 0.1306502135441867 | 0.7382876537174782 |
| O | O | 0.9408204290591565 | 0.8014083457162002 | 0.0490102652812317 |
| O | O | 0.9626776536163036 | 0.7577849441127142 | 0.5528019101850549 |
| O | O | 0.1841711747403116 | 0.5727261293523416 | 0.0213813648975558 |
| O | O | 0.1844166977617077 | 0.5768392492491539 | 0.5208053115347403 |
| O | O | 0.1700163647077582 | 0.3978476372501895 | 0.2301494946737708 |
| O | O | 0.1317829482069267 | 0.3616047641017581 | 0.7547577250217913 |
| O | O | 0.0374117208449300 | 0.2514407534626628 | 0.2886872062976165 |
| O | O | 0.0082109343244673 | 0.1984666814176612 | 0.7898304785811936 |
| O | O | 0.8081282131646842 | 0.4428826043261596 | 0.2894057680797300 |
| O | O | 0.8294126910092050 | 0.4234610291829218 | 0.7817274784782452 |
| O | O | 0.8505041898469122 | 0.6242279548741936 | 0.0057314507002326 |
| O | O | 0.8190478057338167 | 0.6258855432554427 | 0.4909865074417556 |
| O | O | 0.8043586698223810 | 0.9518925842604106 | 0.3008053364383152 |
| O | O | 0.7764576172388902 | 0.9565771912940978 | 0.8017966062787524 |
| O | O | 0.5394431700039829 | 0.1783164411199301 | 0.3088795404664302 |
| O | O | 0.5424833360807280 | 0.1963153515367533 | 0.8116731592301694 |
| O | O | 0.4001418638490372 | 0.1655849341338266 | 0.9948888472439452 |
| O | O | 0.3836801812770224 | 0.1660303409492151 | 0.4987873261689805 |
| O | O | 0.2444664752973643 | 0.0483197841541287 | 0.0548309207581111 |
| O | O | 0.2269941330931871 | 0.0434121089130810 | 0.5551672882601574 |
| O | O | 0.4026868624069158 | 0.8354691460755186 | 0.0326634618580996 |
| O | O | 0.4518003809108414 | 0.8034604697291561 | 0.5487910565965998 |
| O | O | 0.6341318067566287 | 0.8418207521644419 | 0.2619542045659204 |
| O | O | 0.6249153160795990 | 0.8445919057726661 | 0.7296203802153015 |



|   |   |                    |                    |                    |
|---|---|--------------------|--------------------|--------------------|
| O | O | 0.0193680747890998 | 0.2007688877118264 | 0.4610549959308883 |
| O | O | 0.0335437299002059 | 0.2041347050591985 | 0.9668651627386732 |
| O | O | 0.7846930716384160 | 0.4320265731845714 | 0.4651734805664424 |
| O | O | 0.8093305275911148 | 0.4398090161600577 | 0.9579996349894029 |
| O | O | 0.9041449875064649 | 0.6179064356152973 | 0.2471025320653809 |
| O | O | 0.8794528621945864 | 0.6153153732789595 | 0.7638784659243135 |
| O | O | 0.0001041386957260 | 0.7938773423185317 | 0.2183819544422526 |
| O | O | 0.9884723044371960 | 0.7890223495463822 | 0.7263082969825893 |
| O | O | 0.1446870764554836 | 0.5859486731191629 | 0.1970609867777607 |
| O | O | 0.1948333288749912 | 0.5426518537670320 | 0.6973846324378299 |
| O | O | 0.1061361760843516 | 0.3773709024158134 | 0.5115587559711317 |
| O | O | 0.1297860316025055 | 0.3835653848561137 | 0.9927986422219047 |
| O | O | 0.2767739850802135 | 0.8926449971266542 | 0.1523138663440451 |
| O | O | 0.2984761988365663 | 0.8835809874812830 | 0.6150570327645846 |
| O | O | 0.6959568060704556 | 0.0941373232402313 | 0.3490401609255718 |
| O | O | 0.6970397174386193 | 0.1095482986508738 | 0.8582802359849323 |
| O | O | 0.1053333846646202 | 0.7254486907215538 | 0.0857278024979240 |
| O | O | 0.1152134712848052 | 0.6977452812603069 | 0.6378946102736188 |
| O | O | 0.8966232021458065 | 0.3138228069415889 | 0.3869790197472867 |
| O | O | 0.8910286554098555 | 0.2903601428070300 | 0.8922594207253197 |
| O | O | 0.2427500738255115 | 0.0868463676641113 | 0.3860376217532683 |
| O | O | 0.2625661220449766 | 0.0801328354202689 | 0.8835034047578839 |
| O | O | 0.4863360670928908 | 0.8585937666043743 | 0.3928982687836443 |
| O | O | 0.5158103857769505 | 0.8720919770048913 | 0.8891968570825670 |
| O | O | 0.7647005201001977 | 0.9046701392366141 | 0.1343641689674058 |
| O | O | 0.7763265914846369 | 0.9276368615079296 | 0.6280788415262197 |
| O | O | 0.5160155806650337 | 0.1482598940526193 | 0.1375774053042465 |
| O | O | 0.5268956966420985 | 0.1693724671857260 | 0.6397842809650466 |
| O | O | 0.9319193087731577 | 0.7483675787849677 | 0.3797841390035894 |
| O | O | 0.9023579126834039 | 0.7604797639922404 | 0.8815884223935873 |
| O | O | 0.1356690099633391 | 0.5181213920653535 | 0.3646058144944759 |
| O | O | 0.1223535043568256 | 0.5137236970984841 | 0.8607353639576653 |
| O | O | 0.1047908882925599 | 0.2491246685549570 | 0.1245425545238667 |
| O | O | 0.0718018112169446 | 0.2289201876315743 | 0.6276237240422466 |
| O | O | 0.8607904065774210 | 0.4809481893511145 | 0.1232334748529137 |
| O | O | 0.8411083843373874 | 0.5001158270102473 | 0.6223018325663671 |
| O | O | 0.2242126545498869 | 0.2237269835152719 | 0.2620742656510494 |
| O | O | 0.1978368745020114 | 0.1910643943504538 | 0.7555578533945309 |
| O | O | 0.7558475083743202 | 0.7821243948309271 | 0.9937183062569486 |
| O | O | 0.7977846058262682 | 0.8130113533608729 | 0.4869937345037118 |
| O | O | 0.8036096562436227 | 0.7679281669992490 | 0.2482609928277425 |
| O | O | 0.7930677252199247 | 0.7747305480935516 | 0.7367369729698454 |
| O | O | 0.2276049915943140 | 0.2289920471646792 | 0.9899737605593687 |
| O | O | 0.2100518875185478 | 0.2265928891539598 | 0.5035318137600876 |
| O | O | 0.4999546818474083 | 0.0126415390017884 | 0.0079608296660686 |
| O | O | 0.4856071583875123 | 0.9995316311211366 | 0.5241065190510760 |

|    |    |                    |                    |                    |
|----|----|--------------------|--------------------|--------------------|
| O  | O  | 0.9954196937217776 | 0.5102531186250728 | 0.9945361112355207 |
| O  | O  | 0.9706079434394647 | 0.5232935739340996 | 0.4873682953486429 |
| O  | O  | 0.5036877561172217 | 0.9922273767253587 | 0.2457874560236762 |
| O  | O  | 0.5139492237463228 | 0.0118993286682331 | 0.7444941652483199 |
| O  | O  | 0.9958479203946268 | 0.4586230195574032 | 0.2464033699723819 |
| O  | O  | 0.0048389412051637 | 0.4898701108851942 | 0.7170802040601468 |
| O  | O  | 0.0954067655538690 | 0.9169746392276579 | 0.1008190278385041 |
| O  | O  | 0.1055067694792330 | 0.8899412881838726 | 0.6092124652133026 |
| O  | O  | 0.2914334382639568 | 0.6992992967567643 | 0.1280432720675846 |
| O  | O  | 0.3083043017422862 | 0.6890917088424785 | 0.6221930746253425 |
| O  | O  | 0.8919124941507300 | 0.1236423131819141 | 0.3438229121239778 |
| O  | O  | 0.8846071090336587 | 0.0930689010539335 | 0.8961511621401661 |
| O  | O  | 0.7022477392297433 | 0.2909694024927517 | 0.3550001078197857 |
| O  | O  | 0.6997021301594939 | 0.3048421824114486 | 0.8663355055230054 |
| O  | O  | 0.3268083369421650 | 0.5553959084825976 | 0.2980943157390347 |
| O  | O  | 0.4923068719291293 | 0.6698460146018068 | 0.3235479745987377 |
| O  | O  | 0.3991825039748162 | 0.5848861799621713 | 0.4672203005586792 |
| Si | Si | 0.5012271618142711 | 0.1284036863726790 | 0.0327119175338707 |
| Si | Si | 0.7152646299597034 | 0.8788739648087354 | 0.0382336291173068 |
| Si | Si | 0.7518435992922675 | 0.9094352464121240 | 0.5217978513429532 |
| Si | Si | 0.2548784267585421 | 0.1142215862480460 | 0.2814439559922488 |
| Si | Si | 0.2586464000267393 | 0.0998952339076163 | 0.7770774616813206 |
| Si | Si | 0.8917978553417585 | 0.5010958333306285 | 0.2266258150007151 |
| Si | Si | 0.8895279755927015 | 0.5079318183546435 | 0.7203166743831638 |
| Si | Si | 0.1338347573128422 | 0.2794427593544525 | 0.2268851923233176 |
| Si | Si | 0.1023241444050850 | 0.2454056367783565 | 0.7307269011294651 |
| Si | Si | 0.1070043610668004 | 0.4934645913232353 | 0.9665542926083937 |
| Si | Si | 0.8784581817388568 | 0.7358577016530290 | 0.4766226291532626 |
| Si | Si | 0.8619684367719969 | 0.7406862885873912 | 0.9827856832384705 |
| Si | Si | 0.5169203615575416 | 0.8970276407883219 | 0.4935150004585273 |
| Si | Si | 0.5044281737399791 | 0.8955410404737537 | 0.9923644903418493 |
| Si | Si | 0.2681107002255361 | 0.1315140781362777 | 0.4857068438319713 |
| Si | Si | 0.2830782990394448 | 0.1308158475803185 | 0.9812869473644097 |
| Si | Si | 0.4825462733031757 | 0.1040432212472356 | 0.2355991563562687 |
| Si | Si | 0.4860722464680651 | 0.1212313314212258 | 0.7400155256366808 |
| Si | Si | 0.7475364013326893 | 0.8662042617910123 | 0.2373107842635256 |
| Si | Si | 0.7499472555271390 | 0.8786198069419315 | 0.7238241033346333 |
| Si | Si | 0.1138081549814521 | 0.4906666512685048 | 0.2598989126621254 |
| Si | Si | 0.1127893056016194 | 0.4762401378977746 | 0.7577512318638283 |
| Si | Si | 0.9088206796675917 | 0.7330238196427249 | 0.2739197874178400 |
| Si | Si | 0.8924291658713516 | 0.7335588205548904 | 0.7770602957182097 |
| Si | Si | 0.8804638116110518 | 0.5142961010193126 | 0.0208663939893739 |
| Si | Si | 0.8569151866252579 | 0.5194370054299542 | 0.5154954493342709 |
| Si | Si | 0.1244692847940147 | 0.2678071493211525 | 0.0192310578284980 |
| Si | Si | 0.2008325458937718 | 0.9737257069328032 | 0.1327483014934417 |
| Si | Si | 0.2120376946447237 | 0.9547539342238375 | 0.6260338292019477 |

|    |    |                    |                    |                    |
|----|----|--------------------|--------------------|--------------------|
| Si | Si | 0.3505481395353358 | 0.8130146729365046 | 0.1280562038523608 |
| Si | Si | 0.3688944909296982 | 0.7979318973768963 | 0.6312183007992591 |
| Si | Si | 0.7967742055873400 | 0.0450903165659587 | 0.3651573927677541 |
| Si | Si | 0.7753725105128969 | 0.0341867941939598 | 0.8843472575928299 |
| Si | Si | 0.6339959127534670 | 0.1999333247933964 | 0.8818079379710426 |
| Si | Si | 0.0348086415274997 | 0.8083790159354829 | 0.1148967217275783 |
| Si | Si | 0.0436524006532936 | 0.7835434126369125 | 0.6302706237438430 |
| Si | Si | 0.1792527721641447 | 0.6443913877340084 | 0.1070755416638900 |
| Si | Si | 0.1999173779236478 | 0.6263771752933941 | 0.6193068315865276 |
| Si | Si | 0.9616916533449564 | 0.2235122667143866 | 0.3703972758166041 |
| Si | Si | 0.9545991634461691 | 0.1975189294937526 | 0.8861540124994490 |
| Si | Si | 0.7980740946896270 | 0.3688083294049692 | 0.3747247228476345 |
| Si | Si | 0.8089864148284078 | 0.3647953701476653 | 0.8746659303738624 |
| Si | Si | 0.1028163813214819 | 0.2610628856842174 | 0.5253464138156834 |
| Si | Si | 0.6349410398743355 | 0.1867506061009804 | 0.3739362907199644 |
| Al | Al | 0.0872933082449630 | 0.4918492796420112 | 0.4743677905241597 |
| Al | Al | 0.5177777587859890 | 0.8732154538238535 | 0.2771479832694497 |
| Al | Al | 0.5106820233942309 | 0.8913787382305625 | 0.7778774098509948 |
| Al | Al | 0.4941889889389202 | 0.1266108798223904 | 0.5235842529480002 |
| Cu | Cu | 0.2721251385494629 | 0.5656079368000659 | 0.4095369038717430 |
| Cu | Cu | 0.4521828001477454 | 0.7147911741348202 | 0.4314898905080160 |
| Cu | Cu | 0.3877676715653148 | 0.6641925703849965 | 0.2508436755151895 |
| C  | C  | 0.4805071335985845 | 0.4848513113442809 | 0.6604011916502971 |
| H  | H  | 0.5841919452308051 | 0.2198514358898224 | 0.6405680383711270 |
| H  | H  | 0.6032601252752914 | 0.7804629479682500 | 0.7022856652448131 |
| H  | H  | 0.4026771112001952 | 0.4578396788187445 | 0.6688242720682546 |
| H  | H  | 0.4365281297870805 | 0.5472327553379396 | 0.4260382816410014 |
| H  | H  | 0.5118774083591701 | 0.5516049341039874 | 0.6948313079853423 |
| H  | H  | 0.5259937471466588 | 0.4482467061741673 | 0.6146855874953544 |

## References

- [1] G. Li, P. Vassilev, M. Sanchez-Sanchez, J. A. Lercher, E. J. M. Hensen, E. A. Pidko, Stability and Reactivity of Copper Oxo-Clusters in ZSM-5 Zeolite for Selective Methane Oxidation to Methanol. *J. Catal.* **2016**, 338, 305.
